# Supplementary material for: A (TD-)DFT study on photo-NHC catalysis: photoenolization/Diels–Alder reaction of acid fluorides catalyzed by N-heterocyclic carbenes
Source: Royal Society of Chemistry journal article supplement (doi:10.1039/d2sc04732b), 2023-01-01
Supplement: d2sc04732b1.pdf [file d2sc04732b1.pdf]

## Supporting Information

### A (TD-)DFT Study on Photo-NHC Catalysis: Photoenolization/Diels-Alder Reaction of Acid Fluorides Catalyzed by *N*-Heterocyclic Carbenes

Andreas Mavroskoufis,<sup>‡</sup> Manish Lohani,<sup>†</sup> Manuela Weber,<sup>‡</sup> Matthew N. Hopkinson,<sup>‡,§,\*</sup> and Jan P. Götzke<sup>†,\*</sup>

<sup>†</sup> Institut für Chemie und Biochemie, Freie Universität Berlin, Arnimallee 22, 14195 Berlin, Germany

<sup>‡</sup> Institut für Chemie und Biochemie, Freie Universität Berlin, Fabeckstraße 34/36, 14195 Berlin, Germany

<sup>§</sup> School of Natural and Environmental Sciences, Newcastle University, Bedson Building, Newcastle upon Tyne, NE1 7RU, UK.

\*[matthew.hopkinson@newcastle.ac.uk](mailto:matthew.hopkinson@newcastle.ac.uk) \*[jan.goetze@fu-berlin.de](mailto:jan.goetze@fu-berlin.de)

#### Table of Contents

|                                                                                               |     |
|-----------------------------------------------------------------------------------------------|-----|
| <b>1. (TD-)DFT Calculations</b> .....                                                         | S1  |
| 1.1 Formation of <b>A</b> from <b>1</b> and NHC.....                                          | S1  |
| 1.2 Photoenolization of <b>A</b> .....                                                        | S4  |
| 1.3 Triplet rotation of <b>T</b> <sub>1</sub> ( <b>B</b> ).....                               | S7  |
| 1.4 Cycloaddition of ( <i>E</i> )- <b>(B)</b> with <b>2</b> .....                             | S9  |
| 1.5 Cycloaddition of ( <i>E</i> )- <b>B'</b> with <b>2</b> .....                              | S13 |
| 1.6 Cycloaddition of Me-( <i>E</i> )- <b>B'</b> with <b>2</b> .....                           | S15 |
| 1.7 Cycloaddition of Ph-( <i>E</i> )- <b>B'</b> with <b>2</b> .....                           | S17 |
| 1.8 Sigmatropic rearrangement of ( <i>Z</i> )- <b>B</b> and cycloaddition with <b>2</b> ..... | S19 |
| 1.9 Dissociation of <i>anti/syn</i> - <b>D'</b> .....                                         | S22 |
| 1.10 Calculated UV-Vis spectra.....                                                           | S24 |
| <b>2. Catalytic Test Reactions</b> .....                                                      | S27 |
| <b>3. Crystallographic Data</b> .....                                                         | S28 |

## 1. (TD-)DFT Calculations

### 1.1 Formation of **A** from **1** and NHC

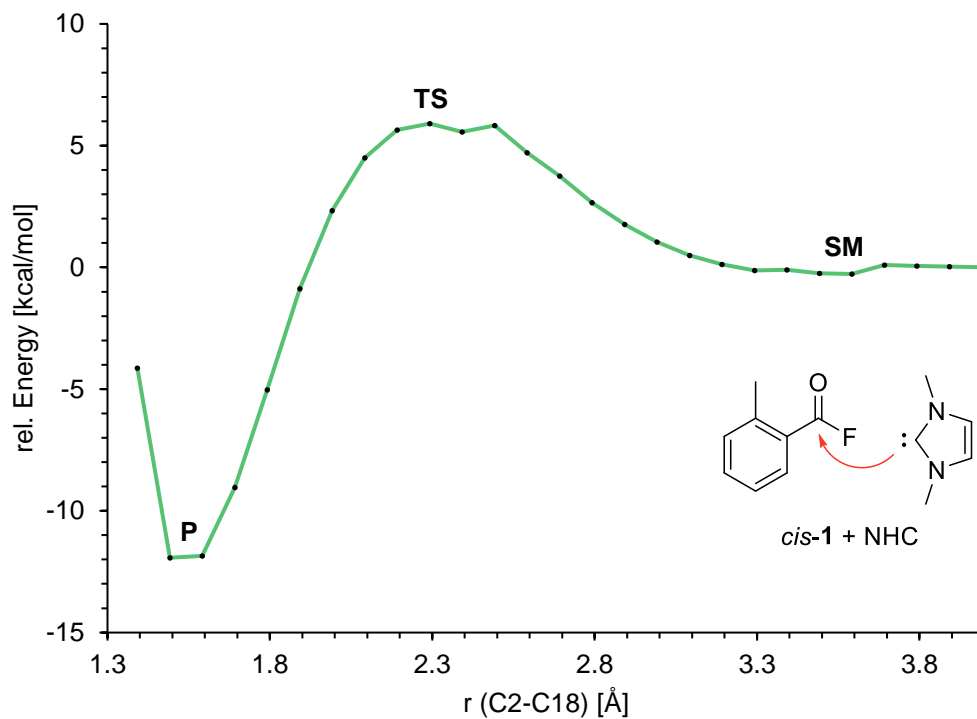

| Species   | r (C2-C18) [Å] | Gibbs Free Energy [Eh] | rel. Gibbs Free Energy [kcal/mol] | Imaginary Frequencies      |
|-----------|----------------|------------------------|-----------------------------------|----------------------------|
| <b>SM</b> | 3.59           | -788.568402            | 0.00                              | 0                          |
| <b>TS</b> | 2.28           | -788.548651            | 12.4                              | 1 (-184 cm <sup>-1</sup> ) |
| <b>P</b>  | 1.54           | -788.572122            | -2.33                             | 0                          |

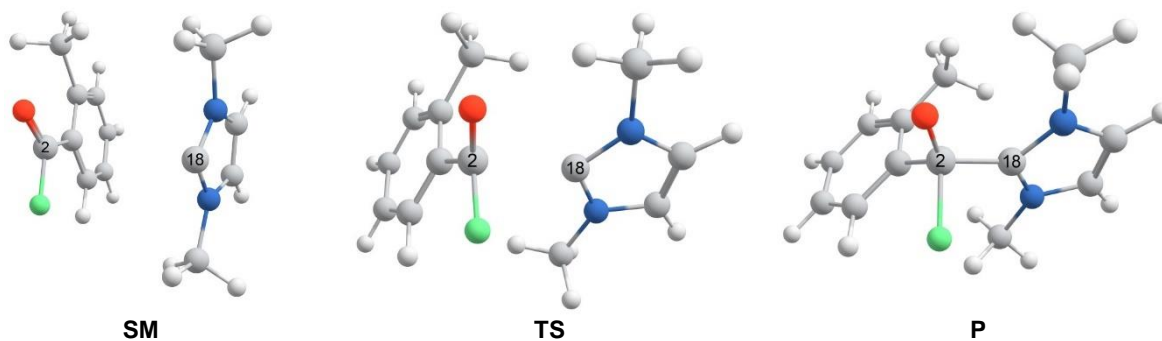

**Figure S1.** Relaxed PES scan of the nucleophilic addition of NHC on *cis*-1 along the C2-C18 coordinate and the Gibbs free energies (298 K) and geometries of the involved species (CAM-B3LYP).

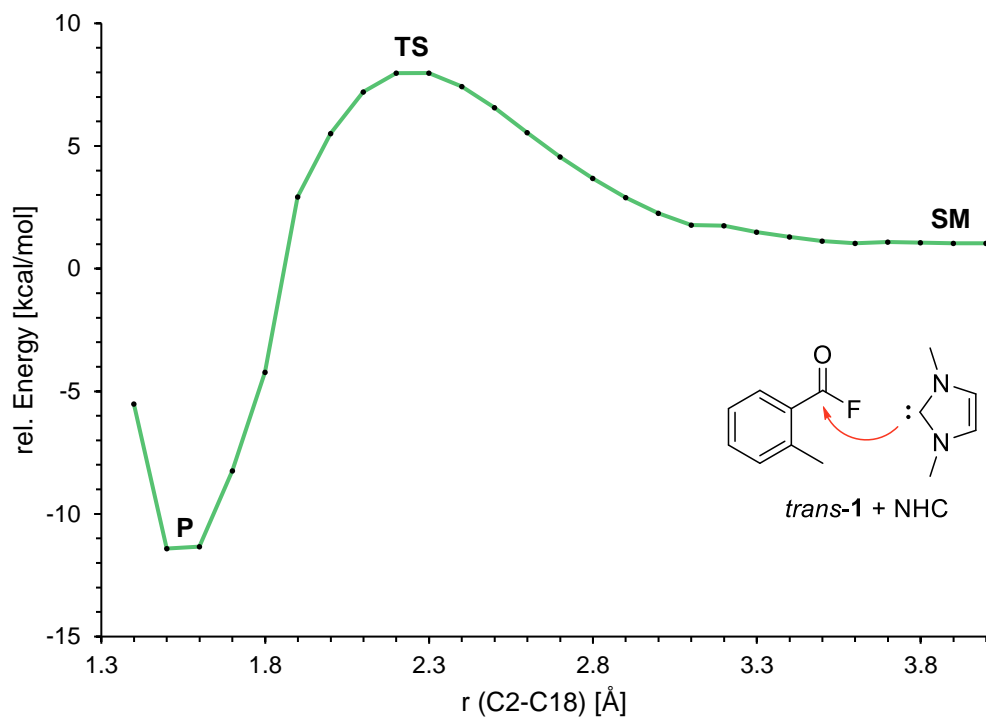

| Species   | r (C2-C18) [Å] | Gibbs Free Energy [Eh] | rel. Gibbs Free Energy [kcal/mol] | Imaginary Frequencies      |
|-----------|----------------|------------------------|-----------------------------------|----------------------------|
| <b>SM</b> | 3.92           | -788.567354            | 0.00                              | 0                          |
| <b>TS</b> | 2.27           | -788.547667            | 13.0                              | 1 (-186 cm <sup>-1</sup> ) |
| <b>P</b>  | 1.54           | -788.571550            | -1.98                             | 0                          |

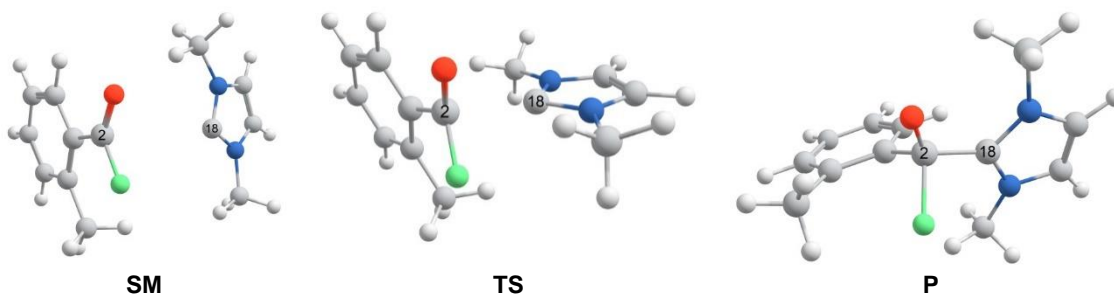

**Figure S2.** Relaxed PES scan of the nucleophilic addition of the NHC on *trans*-1 along the C2-C18 coordinate and the Gibbs free energies (298 K) and geometries of the involved species (CAM-B3LYP).

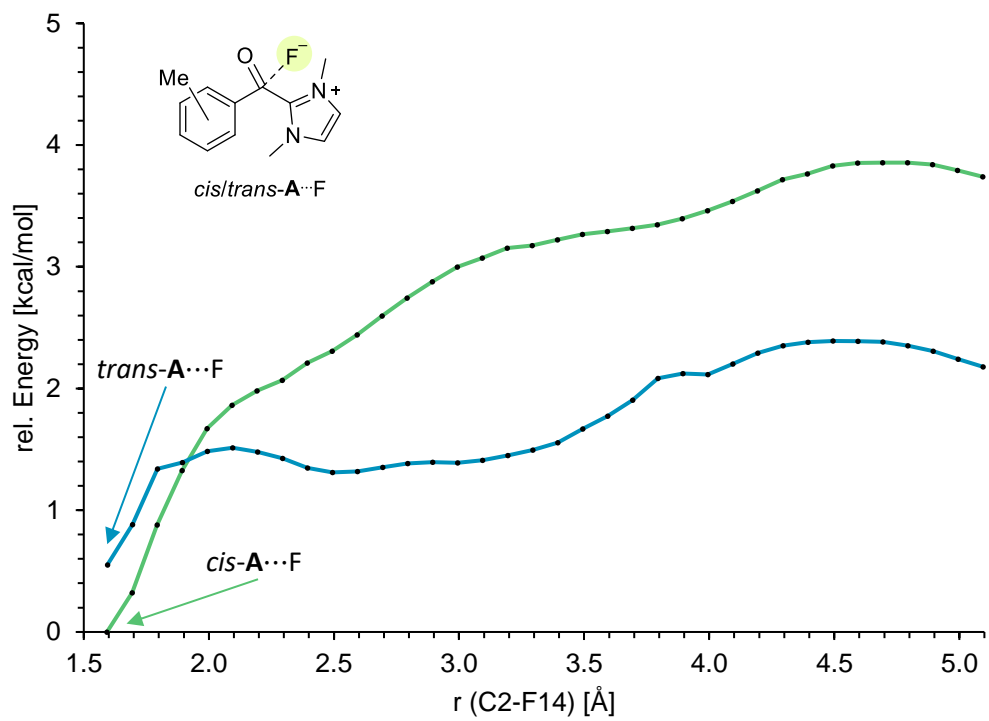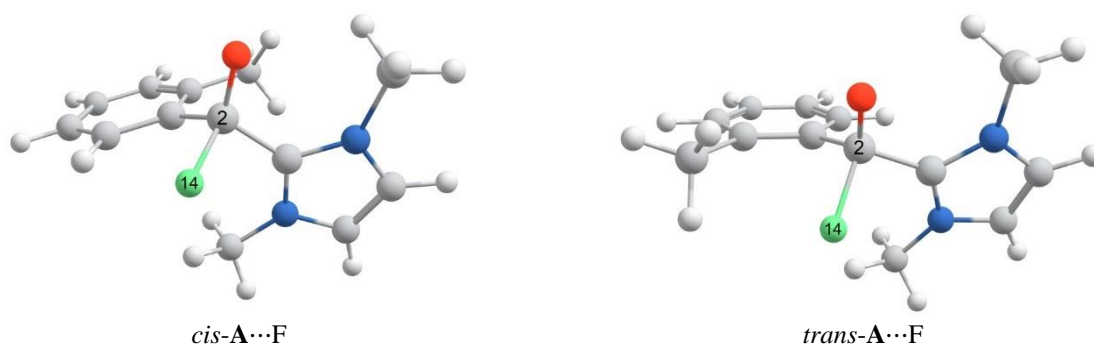

**Figure S3.** Relaxed PES scans for the fluoride elimination of *cis-A...F* (green) and *trans-A...F* (blue) along the C2-F14 coordinate (CAM-B3LYP).

## 1.2 Photoenolization of A

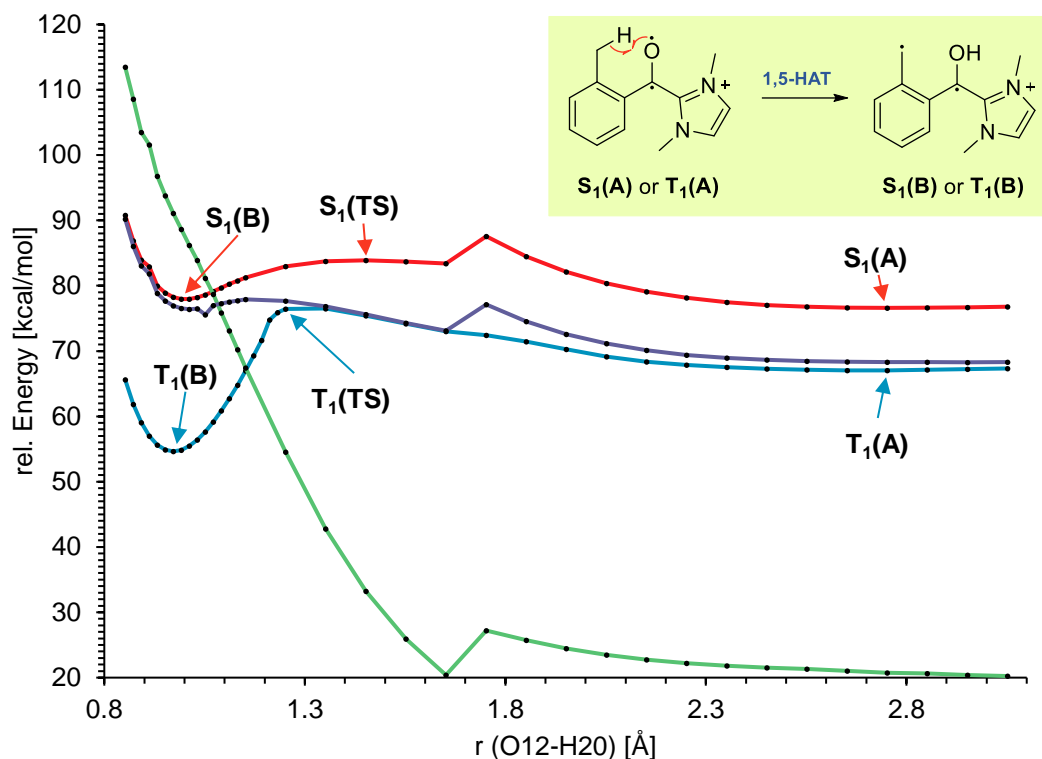

| Species                  | $r$ (O12-H2O) [Å] | Gibbs Free Energy [Eh] | rel. Gibbs Free Energy [kcal/mol] | Imaginary Frequencies       |
|--------------------------|-------------------|------------------------|-----------------------------------|-----------------------------|
| <b>A</b>                 | 2.65              | -688.562228            | 0.00                              | 0                           |
| <b>S<sub>1</sub>(A)</b>  | 2.72              | -688.442785            | 75.0                              | 0                           |
| <b>S<sub>1</sub>(TS)</b> | 1.43              | -688.430696            | 82.5                              | 1 (-494 cm <sup>-1</sup> )  |
| <b>S<sub>1</sub>(B)</b>  | 1.00              | -688.430059            | 82.9                              | 0                           |
| <b>T<sub>1</sub>(A)</b>  | 2.72              | -688.458081            | 65.4                              | 0                           |
| <b>T<sub>1</sub>(TS)</b> | 1.29              | -688.443702            | 74.4                              | 1 (-1402 cm <sup>-1</sup> ) |
| <b>T<sub>1</sub>(B)</b>  | 0.97              | -688.477034            | 53.5                              | 0                           |

### Calculated SOCMEs of selected S<sub>1</sub> geometries

| $r$ (O12-H2O) [Å]              | Root           |                                         | $\langle T   H_{SO}   S \rangle$ (Re, Im) [cm <sup>-1</sup> ] |               |                | $\sqrt{Z^2 + X^2 + Y^2}$ |
|--------------------------------|----------------|-----------------------------------------|---------------------------------------------------------------|---------------|----------------|--------------------------|
|                                |                |                                         | Z                                                             | X             | Y              |                          |
| 2.72, <b>S<sub>1</sub>(A)</b>  | T <sub>1</sub> | S <sub>0</sub>                          | (0.00, 29.2)                                                  | (0.00, 19.8)  | (-0.00, 25.7)  | 43.6                     |
|                                | T <sub>1</sub> | S <sub>1</sub>                          | (0.00, 1.39)                                                  | (0.00, -0.15) | (-0.00, -0.26) | 1.4                      |
| 1.43, <b>S<sub>1</sub>(TS)</b> | T <sub>1</sub> | S <sub>0</sub>                          | (0.00, -35.2)                                                 | (0.00, 4.79)  | (-0.00, 0.76)  | 36                       |
|                                | T <sub>1</sub> | S <sub>1</sub>                          | (0.00, -1.99)                                                 | (0.00, 0.24)  | (-0.00, -0.26) | 2.0                      |
| 1.00, <b>S<sub>1</sub>(B)</b>  | T <sub>1</sub> | S <sub>0</sub> (former S <sub>1</sub> ) | (0.00, 8.61)                                                  | (0.00, -6.41) | (-0.00, -1.75) | 10.9                     |
|                                | T <sub>1</sub> | S <sub>1</sub> (former S <sub>0</sub> ) | (0.00, -0.17)                                                 | (0.00, 0.24)  | (-0.00, -0.29) | 0.41                     |

**Figure S4:** Relaxed PES scans of the photoenolization of A along the O12-H2O coordinate. Shown are the S<sub>1</sub> (red) and T<sub>1</sub> (blue) surfaces and the singlet ground state (green) and triplet energies (violet) of the S<sub>1</sub> geometries as well as the calculated Gibbs Free energies (298 K) and SOCMEs ((TDA-)CAM-B3LYP).

Comparison of frameworks for the calculation of excited PES with CAM-B3LYP

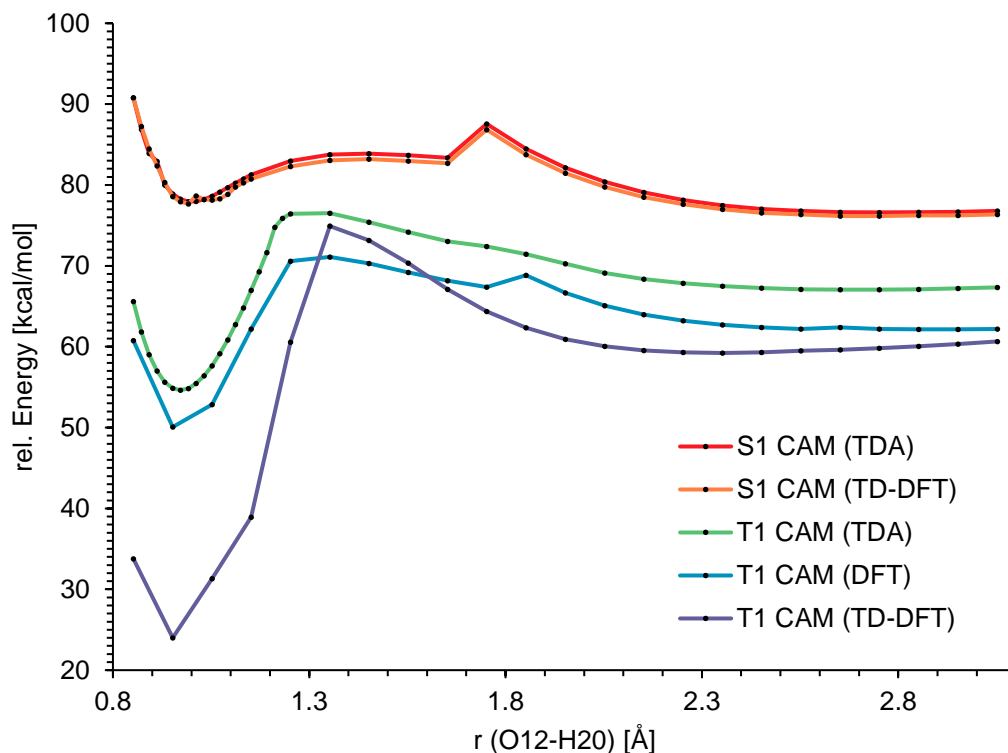

| Species                        | r (O12-H20)<br>[Å] | Gibbs Free<br>Energy [Eh] | rel. Gibbs Free<br>Energy [kcal/mol] | Imaginary<br>Frequencies    |
|--------------------------------|--------------------|---------------------------|--------------------------------------|-----------------------------|
| <b>A</b> [DFT]                 | 2.65               | -688.424773               | 0.00                                 | 0                           |
| <b>S<sub>1</sub>(A)</b> [TDA]  | 2.72               | -688.442785               | 75.0                                 | 0                           |
| <b>S<sub>1</sub>(TS)</b> [TDA] | 1.43               | -688.430696               | 82.5                                 | 1 (-494 cm <sup>-1</sup> )  |
| <b>S<sub>1</sub>(B)</b> [TDA]  | 1.00               | -688.430059               | 82.9                                 | 0                           |
| <b>T<sub>1</sub>(A)</b> [TDA]  | 2.72               | -688.458081               | 65.4                                 | 0                           |
| <b>T<sub>1</sub>(TS)</b> [TDA] | 1.29               | -688.443702               | 74.4                                 | 1 (-1402 cm <sup>-1</sup> ) |
| <b>T<sub>1</sub>(B)</b> [TDA]  | 0.97               | -688.477034               | 53.5                                 | 0                           |
| <b>T<sub>1</sub>(A)</b> [DFT]  | 2.63               | -688.331457               | 57.3                                 | 0                           |
| <b>T<sub>1</sub>(TS)</b> [DFT] | 1.32               | -688.319377               | 66.1                                 | 1 (-1197 cm <sup>-1</sup> ) |
| <b>T<sub>1</sub>(B)</b> [DFT]  | 0.97               | -688.349288               | 47.4                                 | 0                           |

**Figure S5:** Relaxed PES scans of the photoionization of **A** along the O12-H20 coordinate with the CAM-B3LYP functional. Shown are the S<sub>1</sub> (red, orange) and T<sub>1</sub> (blue, indigo, violet) surfaces as well as the calculated Gibbs Free energies (298 K) of the involved species.

Comparison of frameworks for the calculation of excited PES with the PBE0 functional

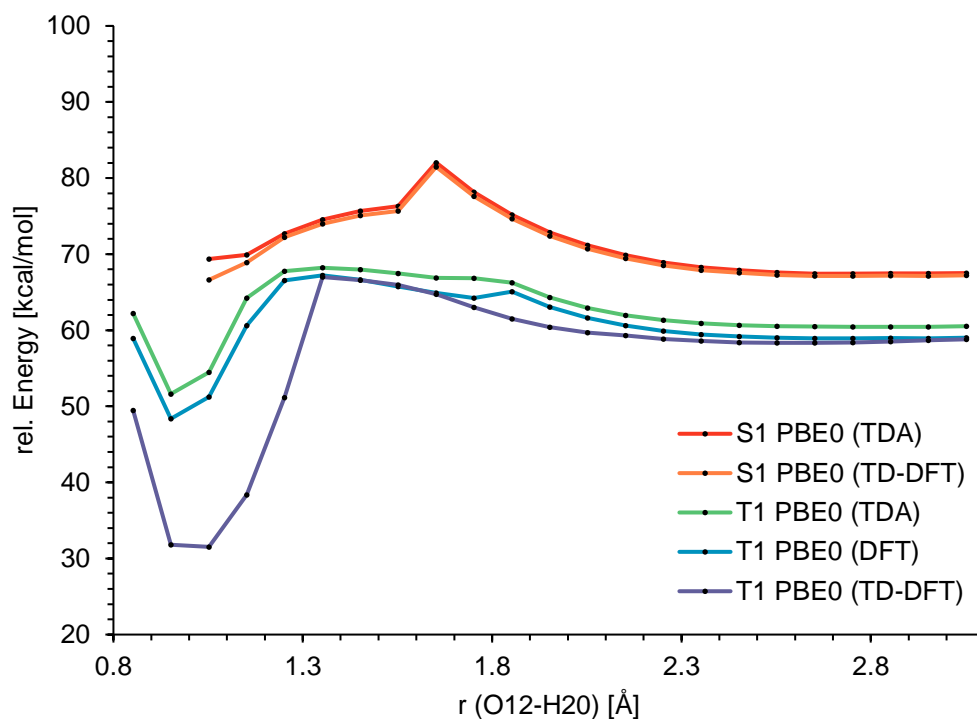

| Species                   | r (O12-H20) [Å]       | Gibbs Free Energy [Eh] | rel. Gibbs Free Energy [kcal/mol] | Imaginary Frequencies       |
|---------------------------|-----------------------|------------------------|-----------------------------------|-----------------------------|
| A [DFT]                   | 2.65                  | -687.993354            | 0.00                              | 0                           |
| S <sub>1</sub> (A) [TDA]  | 2.69                  | -687.889094            | 65.4                              | 0                           |
| S <sub>1</sub> (TS) [TDA] | <i>not determined</i> |                        |                                   |                             |
| S <sub>1</sub> (B) [TDA]  | <i>not determined</i> |                        |                                   |                             |
| T <sub>1</sub> (A) [TDA]  | 2.85                  | -687.900839            | 58.1                              | 0                           |
| T <sub>1</sub> (TS) [TDA] | 1.36                  | -687.889923            | 64.9                              | 1 (-757 cm <sup>-1</sup> )  |
| T <sub>1</sub> (B) [TDA]  | 0.97                  | -687.913357            | 50.2                              | 0                           |
| T <sub>1</sub> (A) [DFT]  | 2.75                  | -687.905183            | 55.3                              | 0                           |
| T <sub>1</sub> (TS) [DFT] | 1.34                  | -687.893364            | 62.7                              | 1 (-1038 cm <sup>-1</sup> ) |
| T <sub>1</sub> (B) [DFT]  | 0.97                  | -687.920313            | 45.8                              | 0                           |

**Figure S6:** Relaxed PES scans of the photoenolization of **A** along the O12-H20 coordinate with the PBE0 functional. Shown are the excited singlet (red, orange) and triplet surfaces (blue, indigo, violet) as well as the calculated Gibbs Free energies (298 K) of most of the involved species.

### 1.3 Triplet rotation of $T_1(B)$

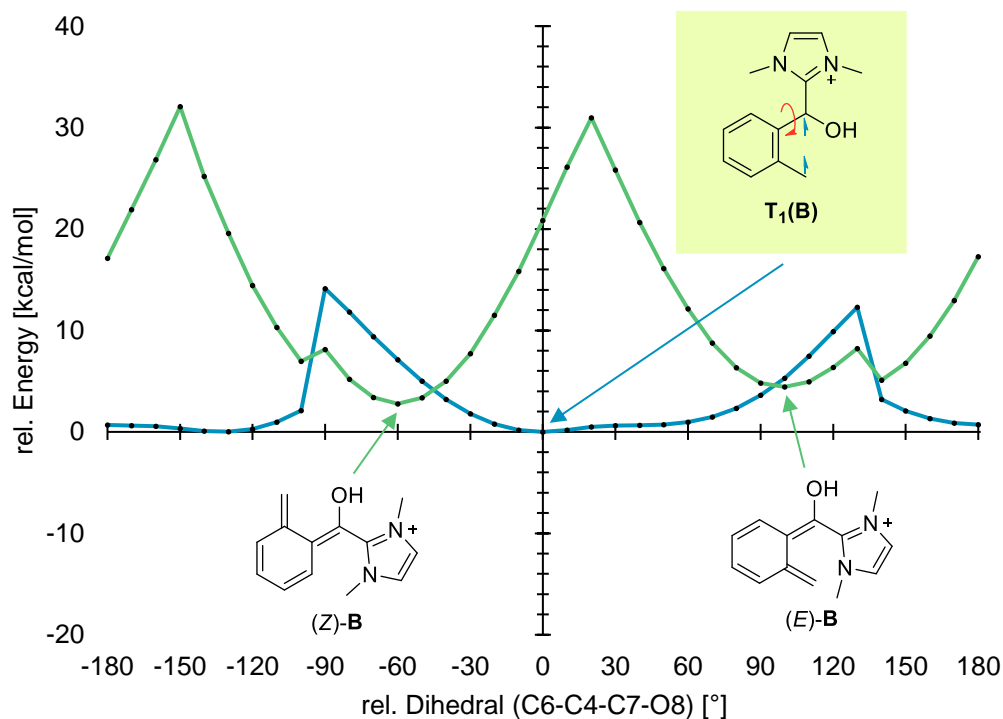

| Species  | absolute Dihedral (C6-C4-C7-O8) [°] | Gibbs Free Energy [Eh] | rel. Gibbs Free Energy [kcal/mol] | Imaginary Frequencies |
|----------|-------------------------------------|------------------------|-----------------------------------|-----------------------|
| A        | 24                                  | -688.562228            | 0.00                              | 0                     |
| $S_1(B)$ | 11                                  | -688.430059            | 82.9                              | 0                     |
| $T_1(B)$ | 60                                  | -688.477034            | 53.5                              | 0                     |
| (Z)-B    | 5                                   | -688.503627            | 36.8                              | 0                     |
| (E)-B    | -167                                | -688.500747            | 38.6                              | 0                     |

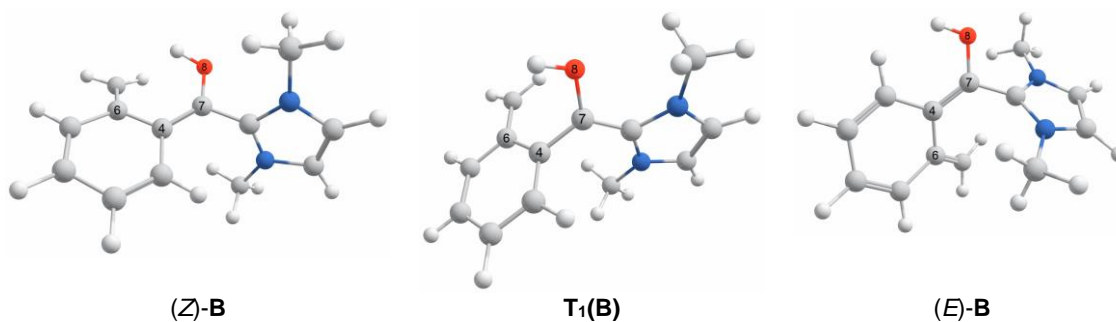

**Figure S7.** Relaxed PES scan of the dihedral (C6-C4-C7-C8) representing rotation around the C-C bond in  $T_1(B)$  (relative dihedral set to 0° for the optimized  $T_1(B)$  geometry). Shown are the  $T_1$  surface (blue) and the corresponding “hot”  $S_0$  surface (green). The *o*-QDMs (Z)-B and (E)-B were obtained after optimization in the respective minimum well of the singlet surface ((TDA-)CAM-B3LYP).



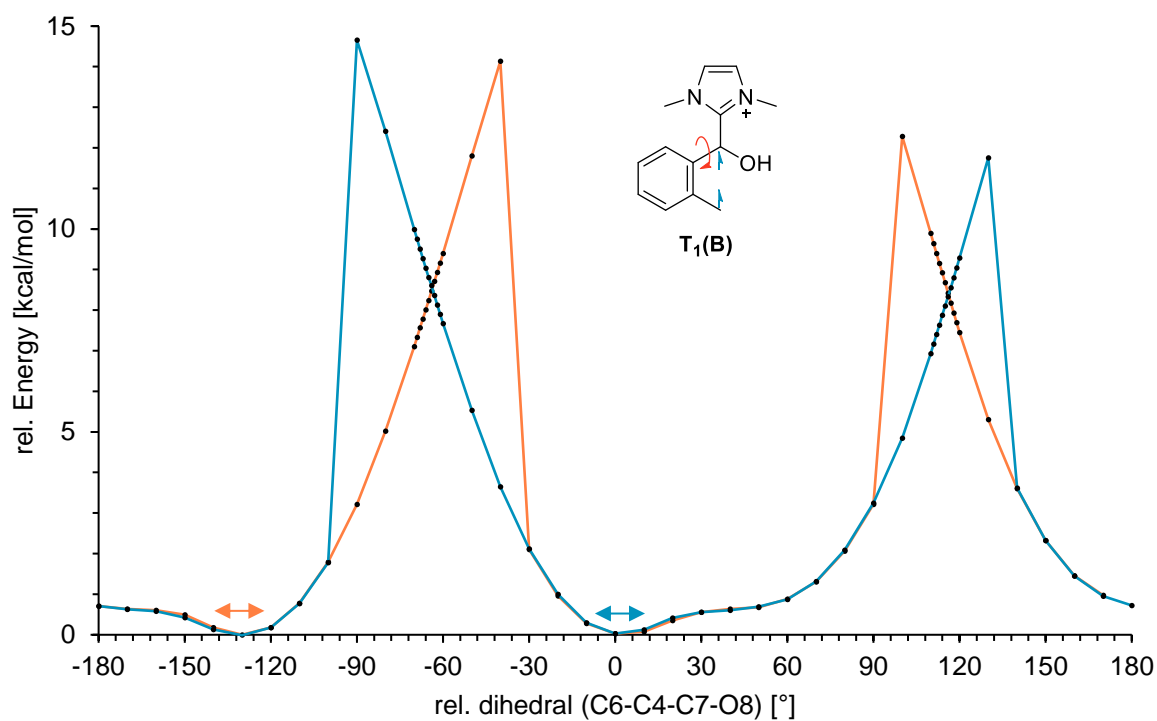

**Figure S8.** Relaxed PES scans of the dihedral (C6-C4-C7-C8) representing rotation around the C-C bond in **T<sub>1</sub>(B)** (relative dihedral set to 0° for the optimized **T<sub>1</sub>(B)** geometry). Shown are the T<sub>1</sub> surfaces (orange and blue) obtained from the two minima of **T<sub>1</sub>(B)** (double arrows) as starting point.

## 1.4 Cycloaddition of (*E*)-**B** with **2**

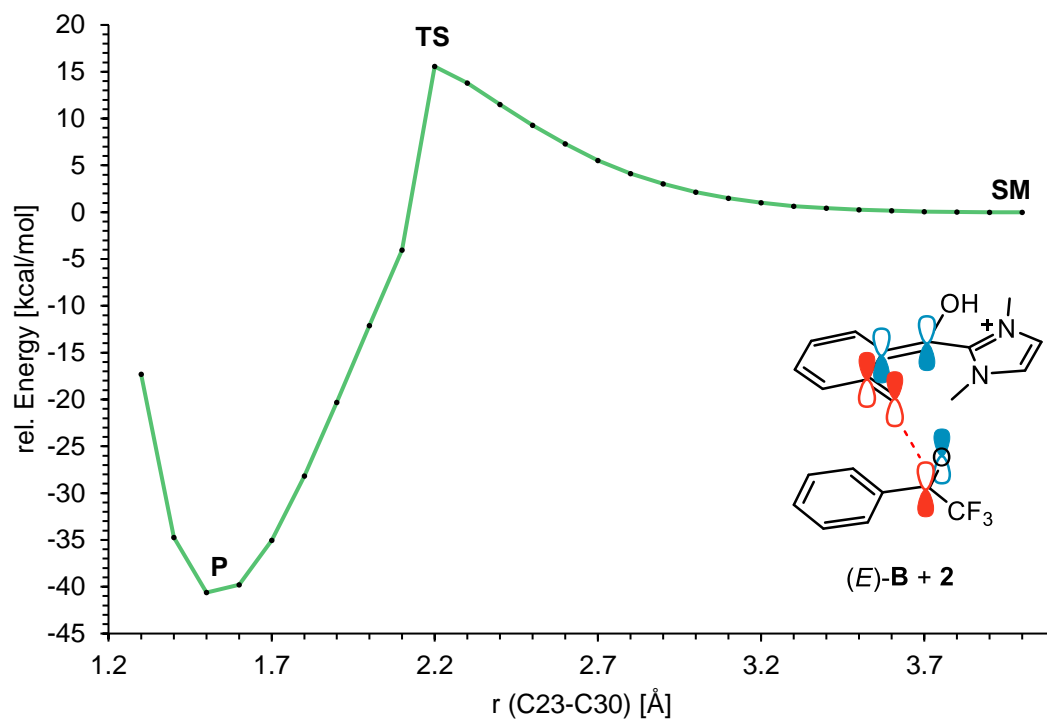

| Species   | r (C23-C30) [Å] | Gibbs Free Energy [Eh] | rel. Gibbs Free Energy [kcal/mol] | Imaginary Frequencies      |
|-----------|-----------------|------------------------|-----------------------------------|----------------------------|
| <b>SM</b> | 3.96            | -1370.959441           | 0.00                              | 0                          |
| <b>TS</b> | 2.20            | -1370.924717           | 21.8                              | 1 (-287 cm <sup>-1</sup> ) |
| <b>P</b>  | 1.54            | -1371.004072           | -28.1                             | 0                          |

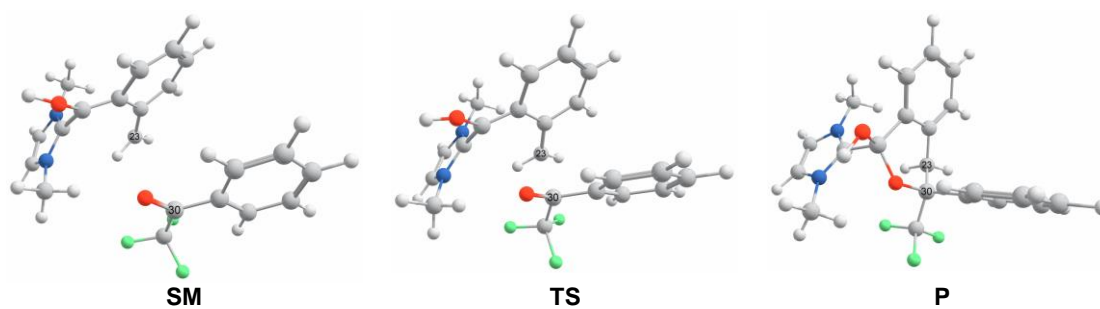

**Figure S9.** Relaxed PES scan of the (*E*)-**B** *endo* cycloaddition with ketone **2** along the C23-C30 coordinate and the Gibbs free energies (298 K) and geometries of the involved species (CAM-B3LYP).

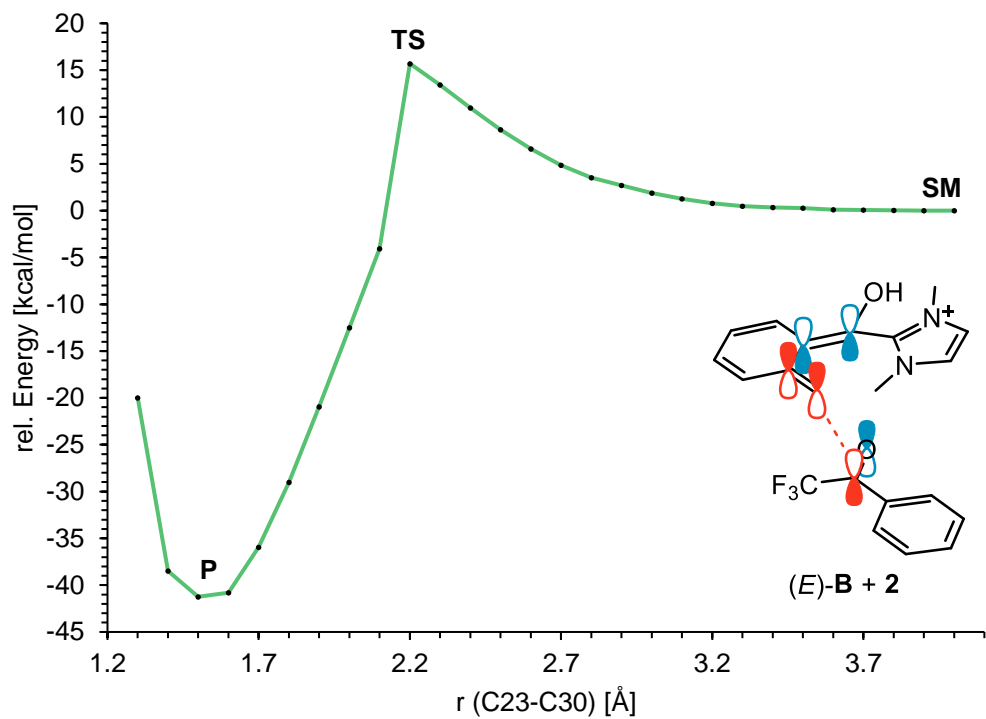

| Species | r (C23-C30) [Å] | Gibbs Free Energy [Eh] | rel. Gibbs Free Energy [kcal/mol] | Imaginary Frequencies      |
|---------|-----------------|------------------------|-----------------------------------|----------------------------|
| SM      | 3.96            | -1370.957778           | 1.04                              | 0                          |
| TS      | 2.16            | -1370.919725           | 24.9                              | 1 (-223 cm <sup>-1</sup> ) |
| P       | 1.53            | -1371.005696           | -29.0                             | 0                          |

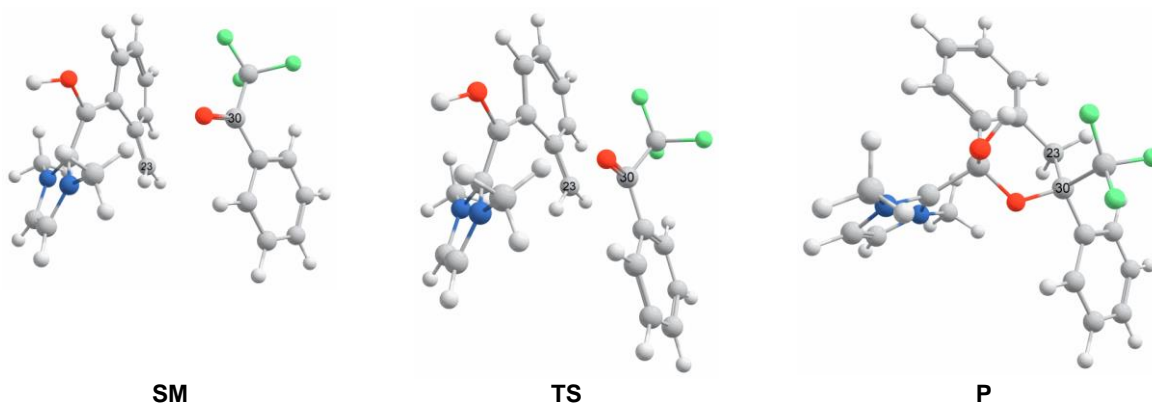

**Figure S10.** Relaxed PES scan of the (E)-B *exo* cycloaddition with ketone **2** along the C23-C30 coordinate and the Gibbs free energies (298 K) and geometries of the involved species (CAM-B3LYP).

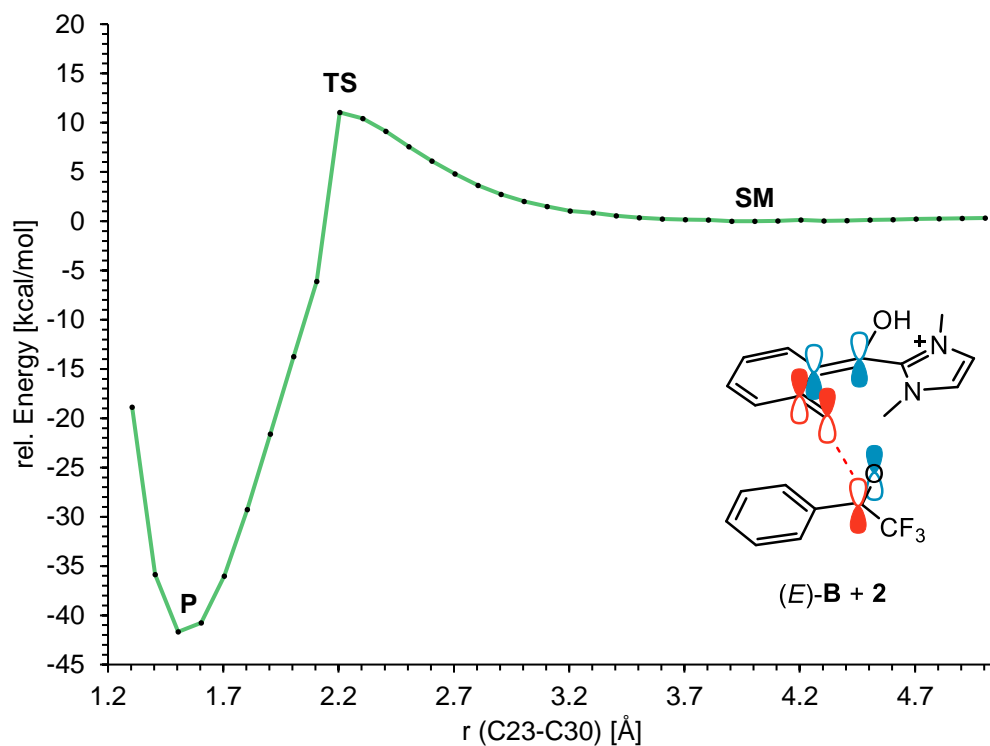

| Species | r (C23-C30) [Å] | Gibbs Free Energy [Eh] | rel. Gibbs Free Energy [kcal/mol] | Imaginary Frequencies      |
|---------|-----------------|------------------------|-----------------------------------|----------------------------|
| SM      | 3.96            | -1370.959298           | 0.25                              | 0                          |
| TS      | 2.17            | -1370.922073           | 23.6                              | 1 (-386 cm <sup>-1</sup> ) |
| P       | 1.54            | -1371.004250           | -28.0                             | 0                          |

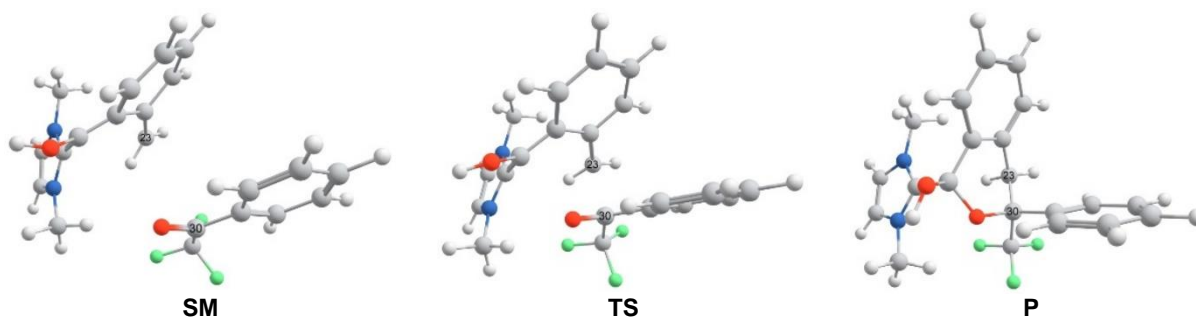

**Figure S11.** Relaxed PES scan of the (*E*)-**B** *endo* cycloaddition with ketone **2** along the C23-C30 coordinate and the Gibbs free energies (298 K) and geometries of the involved species (PBE0).

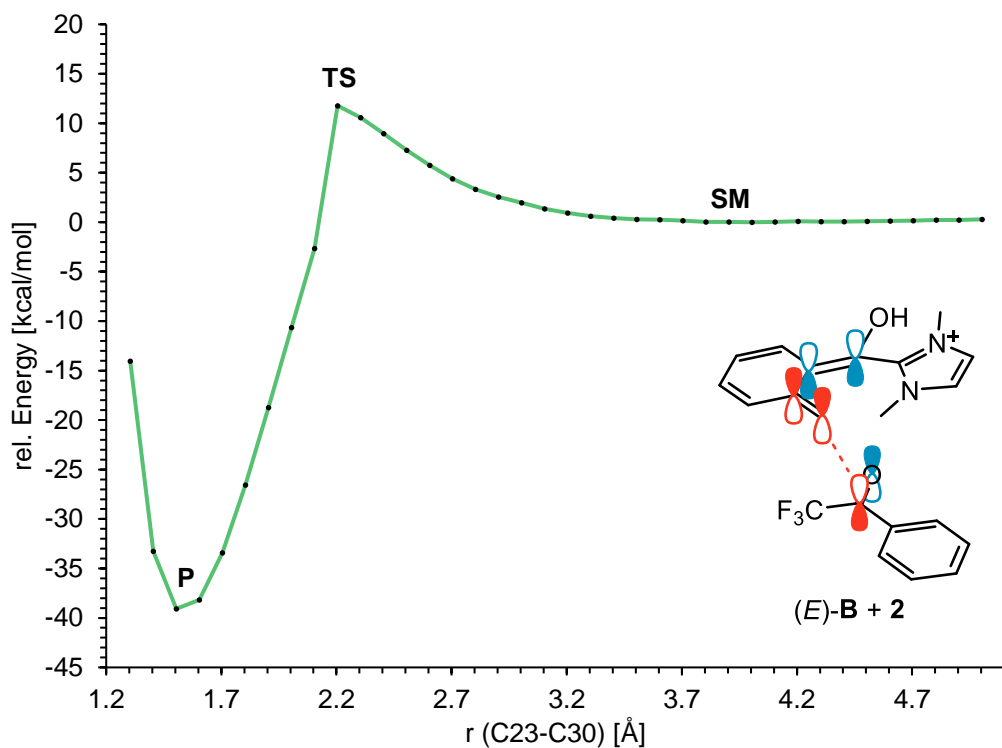

| Species   | r (C23-C30) [Å] | Gibbs Free Energy [Eh] | rel. Gibbs Free Energy [kcal/mol] | Imaginary Frequencies      |
|-----------|-----------------|------------------------|-----------------------------------|----------------------------|
| <b>SM</b> | 3.98            | -1370.959703           | 0.00                              | 0                          |
| <b>TS</b> | 2.12            | -1370.919551           | 25.2                              | 1 (-407 cm <sup>-1</sup> ) |
| <b>P</b>  | 1.54            | -1370.999640           | -25.1                             | 0                          |

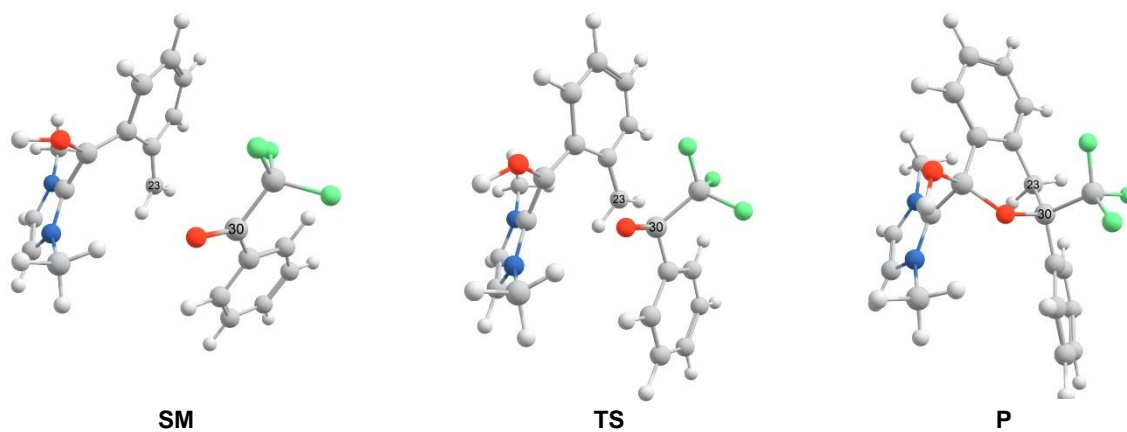

**Figure S12.** Relaxed PES scan of the (E)-**B** *exo* cycloaddition with ketone **2** along the C23-C30 coordinate and the Gibbs free energies (298 K) and geometries of the involved species (PBE0).

### 1.5 Cycloaddition of (*E*)-**B'** with **2**

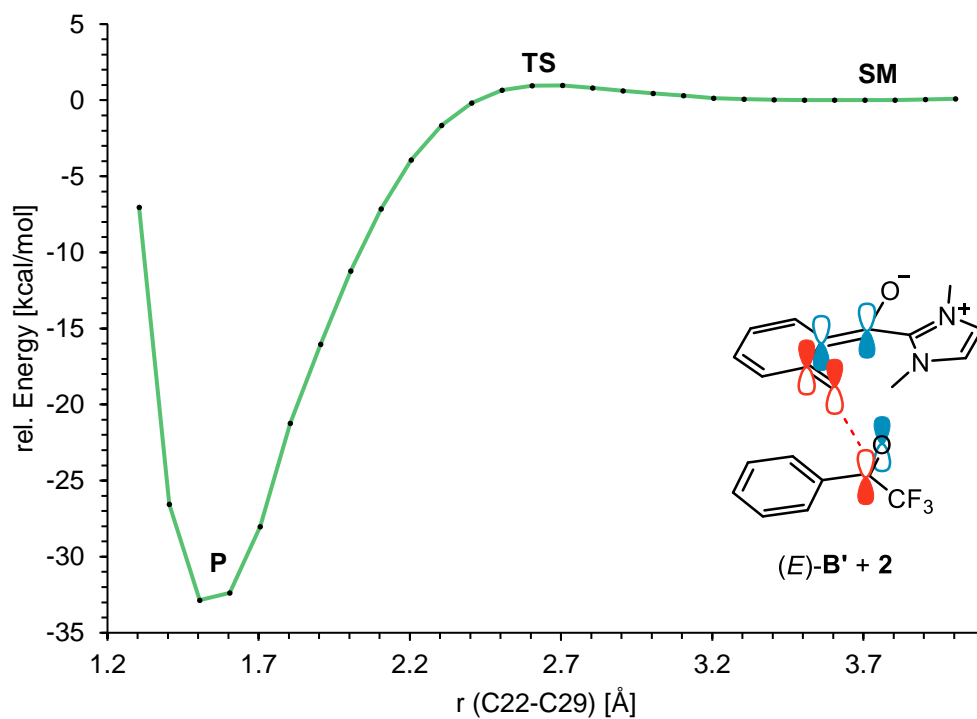

| Species | r (C22-C29) [Å] | Gibbs Free Energy [Eh] | rel. Gibbs Free Energy [kcal/mol] | Imaginary Frequencies      |
|---------|-----------------|------------------------|-----------------------------------|----------------------------|
| SM      | 3.69            | -1370.527297           | 1.15                              | 0                          |
| TS      | 2.62            | -1370.520784           | 5.24                              | 1 (-101 cm <sup>-1</sup> ) |
| P       | 1.54            | -1370.564028           | -21.9                             | 0                          |

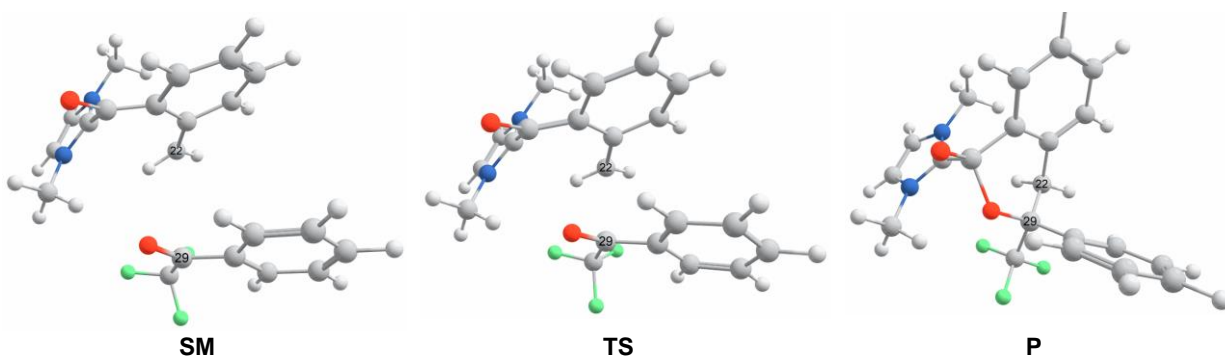

**Figure S13.** Relaxed PES scan of the (*E*)-**B'** *endo* cycloaddition with ketone **2** along the C22-C29 coordinate and the Gibbs free energies (298 K) and geometries of the involved species.

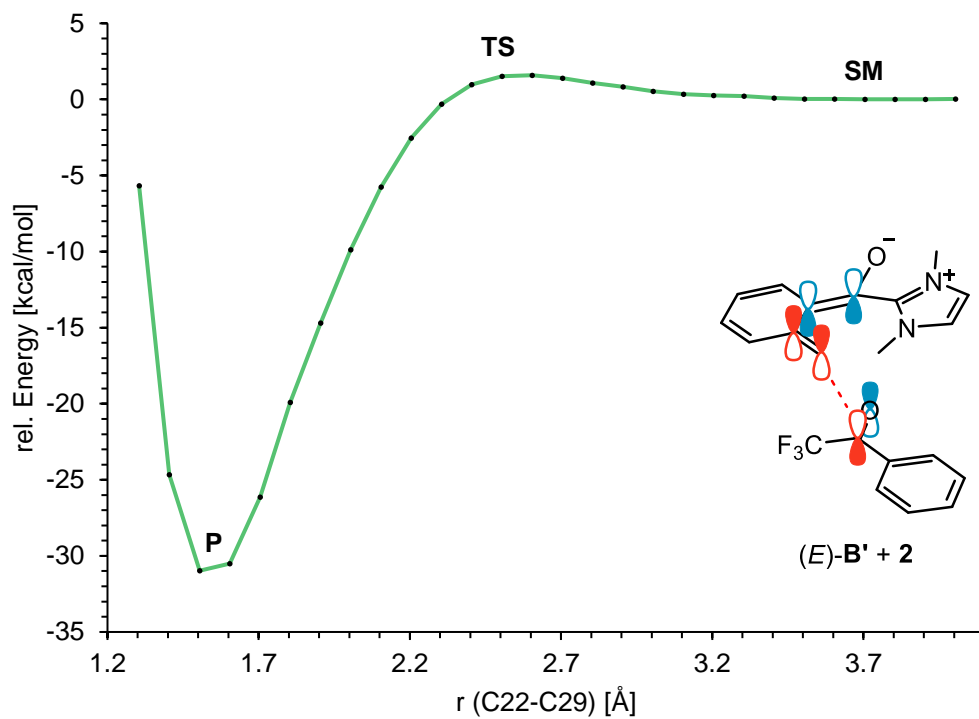

| Species | r (C22-C29) [Å] | Gibbs Free Energy [Eh] | rel. Gibbs Free Energy [kcal/mol] | Imaginary Frequencies      |
|---------|-----------------|------------------------|-----------------------------------|----------------------------|
| SM      | 3.72            | -1370.529132           | 0.00                              | 0                          |
| TS      | 2.56            | -1370.519400           | 6.11                              | 1 (-133 cm <sup>-1</sup> ) |
| P       | 1.54            | -1370.560522           | -19.7                             | 0                          |

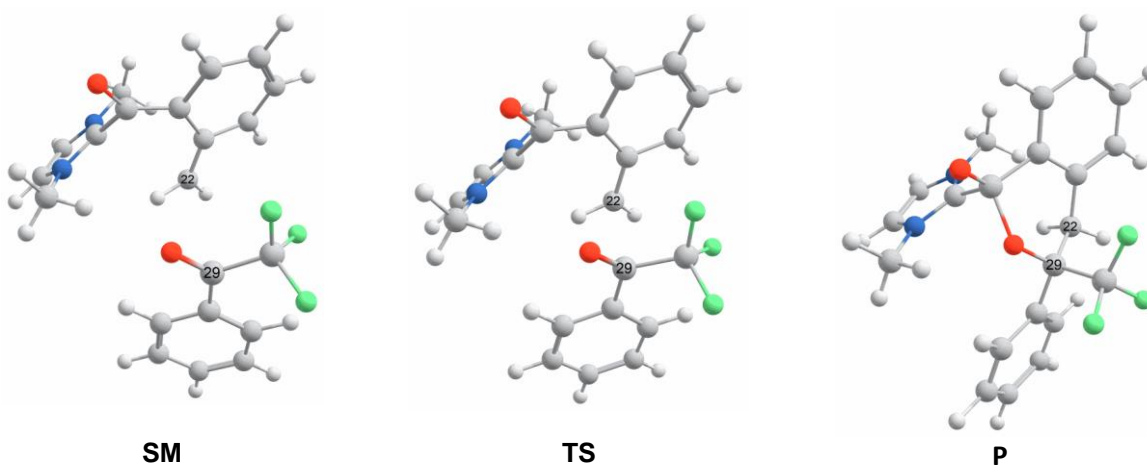

**Figure S14.** Relaxed PES scan of the (E)-B' *exo* cycloaddition with ketone **2** along the C22-C29 coordinate and the Gibbs free energies (298 K) and geometries of the involved species.

### 1.6 Cycloaddition of Me-(*E*)-B' with 2

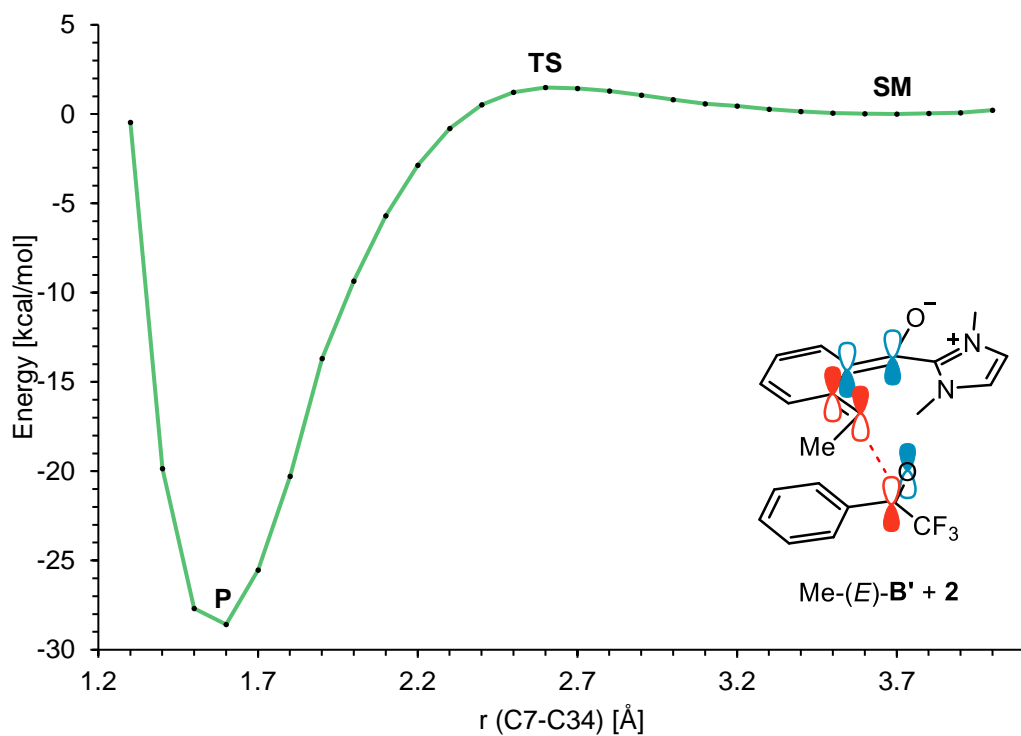

| Species   | r (C7-C34) [Å] | Gibbs Free Energy [Eh] | rel. Gibbs Free Energy [kcal/mol] | Imaginary Frequencies     |
|-----------|----------------|------------------------|-----------------------------------|---------------------------|
| <b>SM</b> | 3.70           | -1409.799626           | 0.11                              | 0                         |
| <b>TS</b> | 2.65           | -1409.786976           | 8.05                              | 1 (-81 cm <sup>-1</sup> ) |
| <b>P</b>  | 1.57           | -1409.820805           | -13.2                             | 0                         |

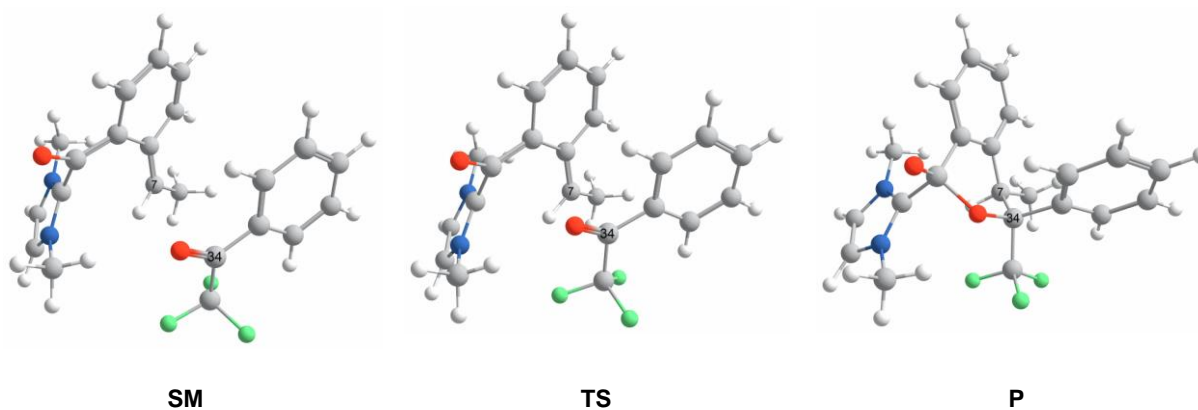

**Figure S15.** Relaxed PES scan of the Me-(*E*)-B' *endo* cycloaddition with ketone **2** along the C7-C34 coordinate and the Gibbs free energies (298 K) and geometries of the involved species.



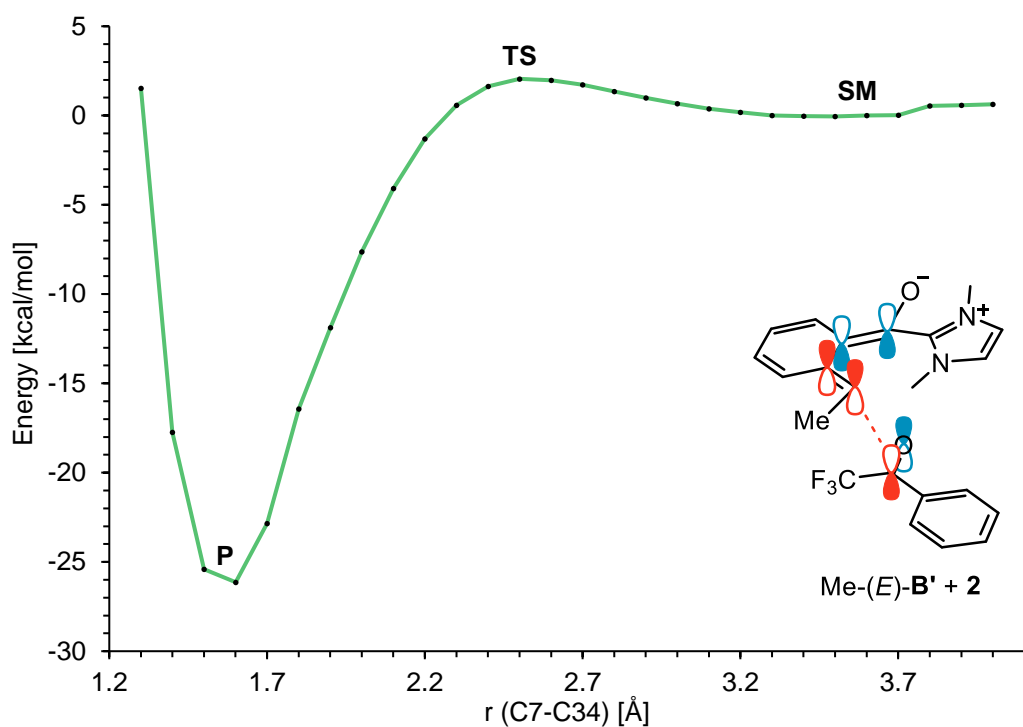

| Species   | r (C7-C34) [Å] | Gibbs Free Energy [Eh] | rel. Gibbs Free Energy [kcal/mol] | Imaginary Frequencies      |
|-----------|----------------|------------------------|-----------------------------------|----------------------------|
| <b>SM</b> | 3.57           | -1409.799802           | 0.00                              | 0                          |
| <b>TS</b> | 2.55           | -1409.788179           | 7.29                              | 1 (-128 cm <sup>-1</sup> ) |
| <b>P</b>  | 1.56           | -1409.824518           | -15.5                             | 0                          |

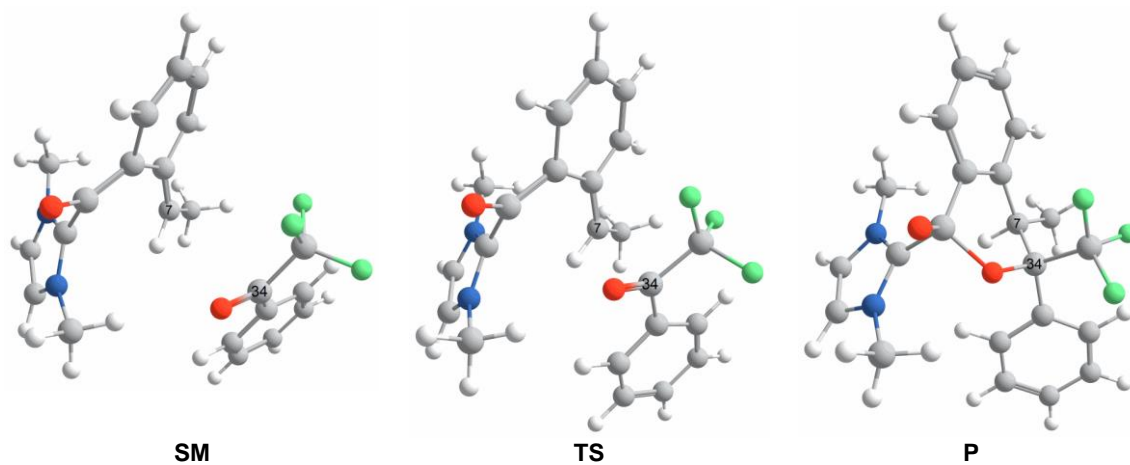

**Figure S16.** Relaxed PES scan of the Me-(*E*)-B' *exo* cycloaddition with ketone **2** along the C7-C34 coordinate and the Gibbs free energies (298 K) and geometries of the involved species.

### 1.7 Cycloaddition of Ph-(*E*)-**B'** with **2**

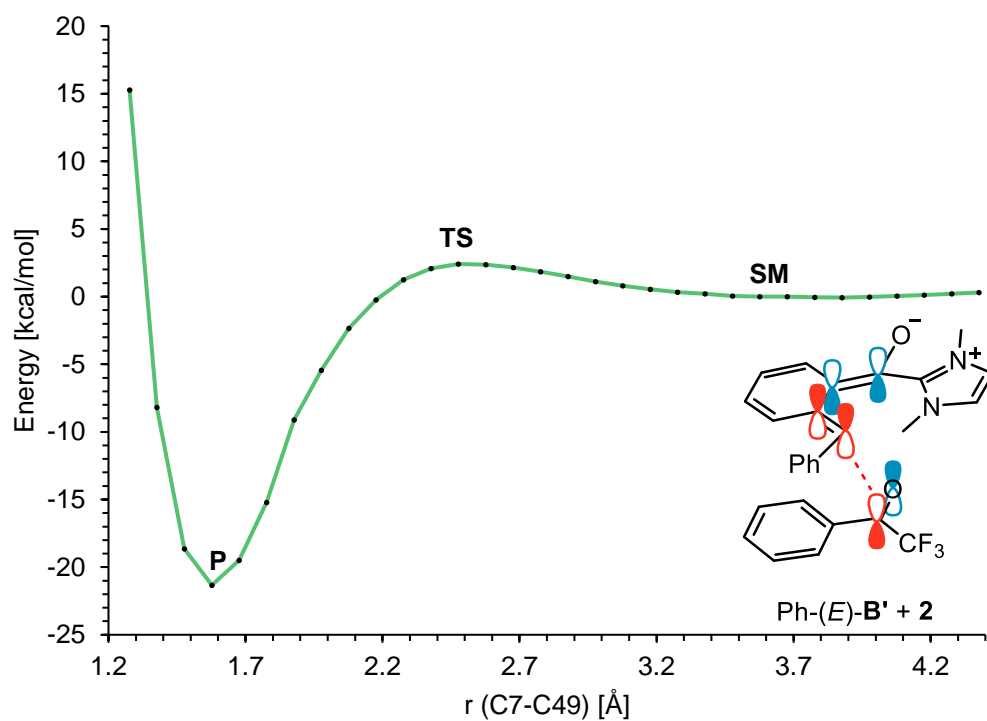

| Species   | $r$ (C7-C49) [Å] | Gibbs Free Energy [Eh] | rel. Gibbs Free Energy [kcal/mol] | Imaginary Frequencies      |
|-----------|------------------|------------------------|-----------------------------------|----------------------------|
| <b>SM</b> | 3.58             | -1601.427024           | 1.24                              | 0                          |
| <b>TS</b> | 2.52             | -1601.408834           | 12.7                              | 1 (-115 cm <sup>-1</sup> ) |
| <b>P</b>  | 1.58             | -1601.435316           | -3.96                             | 0                          |

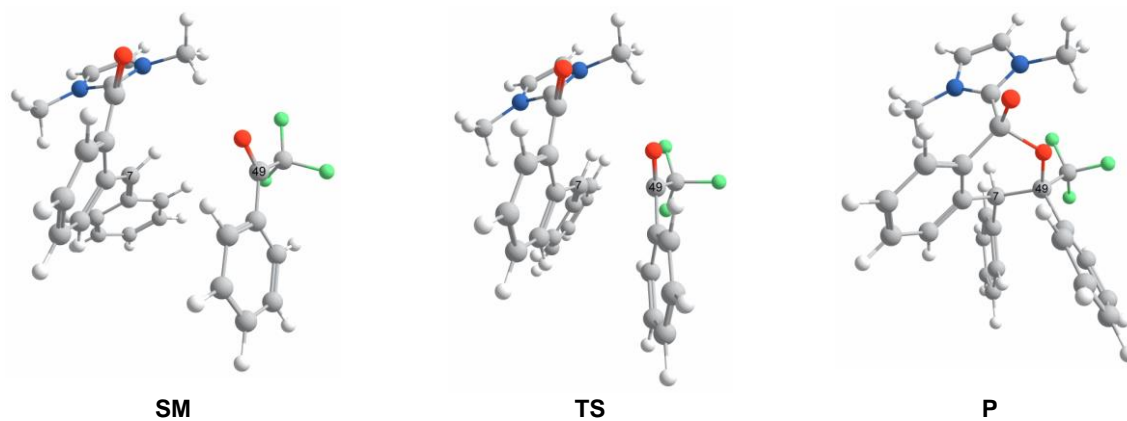

**Figure S17.** Relaxed PES scan of the Ph-(*E*)-**B'** *endo* cycloaddition with ketone **2** along the C7-C49 coordinate and the Gibbs free energies (298 K) and geometries of the involved species.

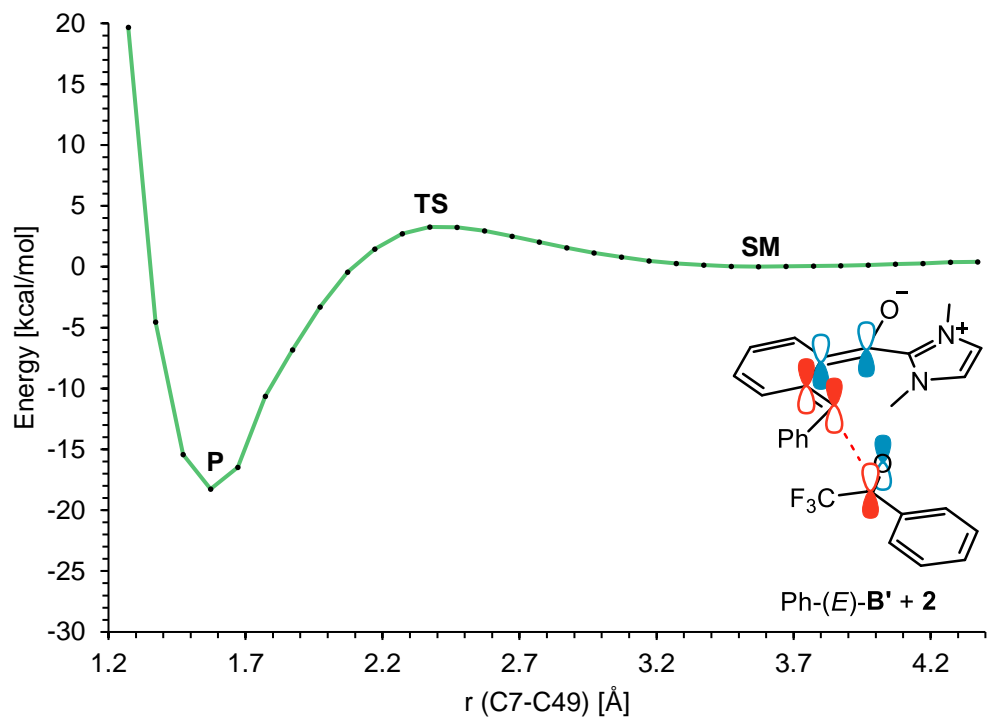

| Species   | r (C7-C49) [Å] | Gibbs Free Energy [Eh] | rel. Gibbs Free Energy [kcal/mol] | Imaginary Frequencies      |
|-----------|----------------|------------------------|-----------------------------------|----------------------------|
| <b>SM</b> | 3.57           | -1601.429004           | 0.00                              | 0                          |
| <b>TS</b> | 2.43           | -1601.410209           | 11.8                              | 1 (-149 cm <sup>-1</sup> ) |
| <b>P</b>  | 1.57           | -1601.439610           | -6.66                             | 0                          |

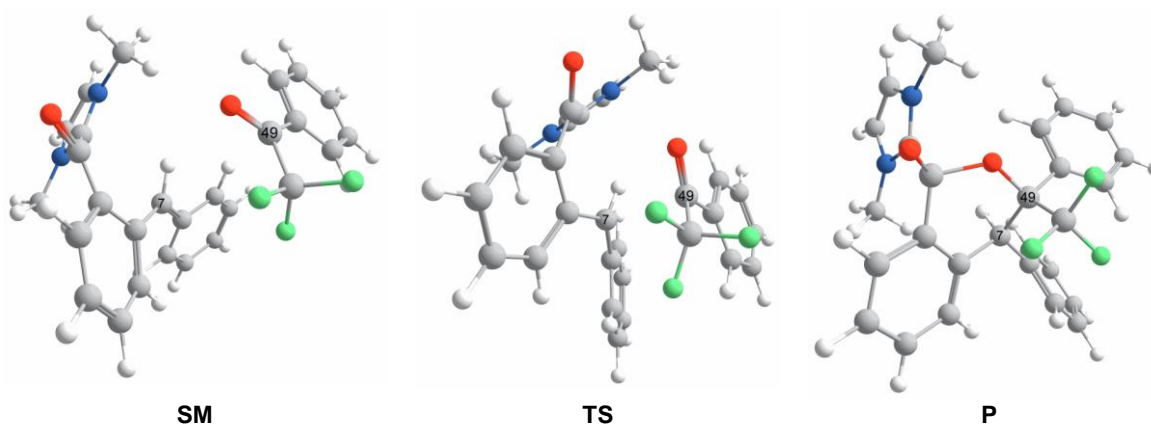

**Figure S18.** Relaxed PES scan of the Ph-(*E*)-B' *exo* cycloaddition with ketone **2** along the C7-C49 coordinate and the Gibbs free energies (298 K) and geometries of the involved species.

## 1.8 Sigmatropic rearrangement of (Z)-**B** and cycloaddition with **2**

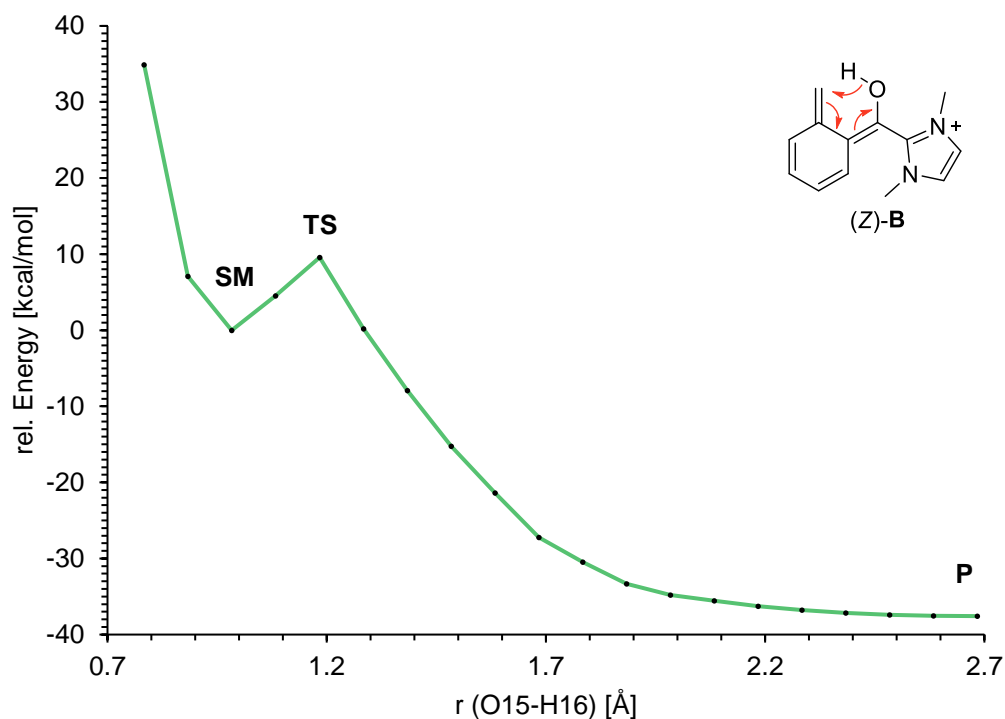

| Species   | r (O15-H16) [Å] | Gibbs Free Energy [Eh] | rel. Gibbs Free Energy [kcal/mol] | Imaginary Frequencies       |
|-----------|-----------------|------------------------|-----------------------------------|-----------------------------|
| <b>SM</b> | 0.98            | -688.365434            | 0.00                              | 0                           |
| <b>TS</b> | 1.16            | -688.352710            | 7.98                              | 1 (-1621 cm <sup>-1</sup> ) |
| <b>P</b>  | 2.68            | -688.425063            | -37.4                             | 0                           |

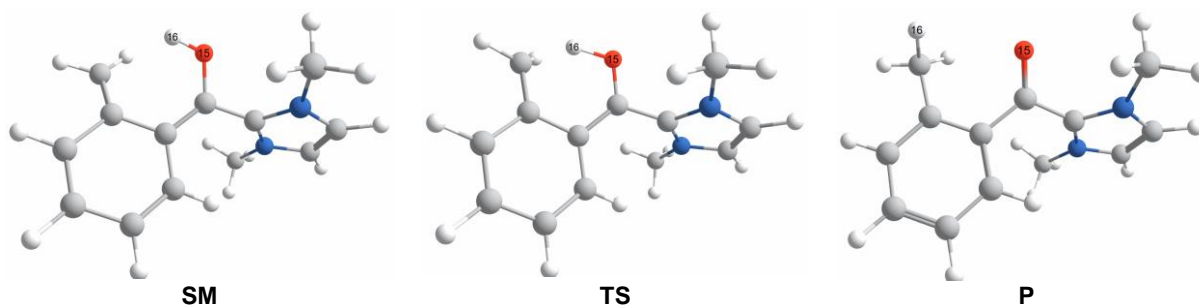

**Figure S19.** Relaxed PES scan of the 1,5-sigmatropic rearrangement of (Z)-**B** along the O15-H16 coordinate and the Gibbs free energies (298 K) and geometries of the involved species.

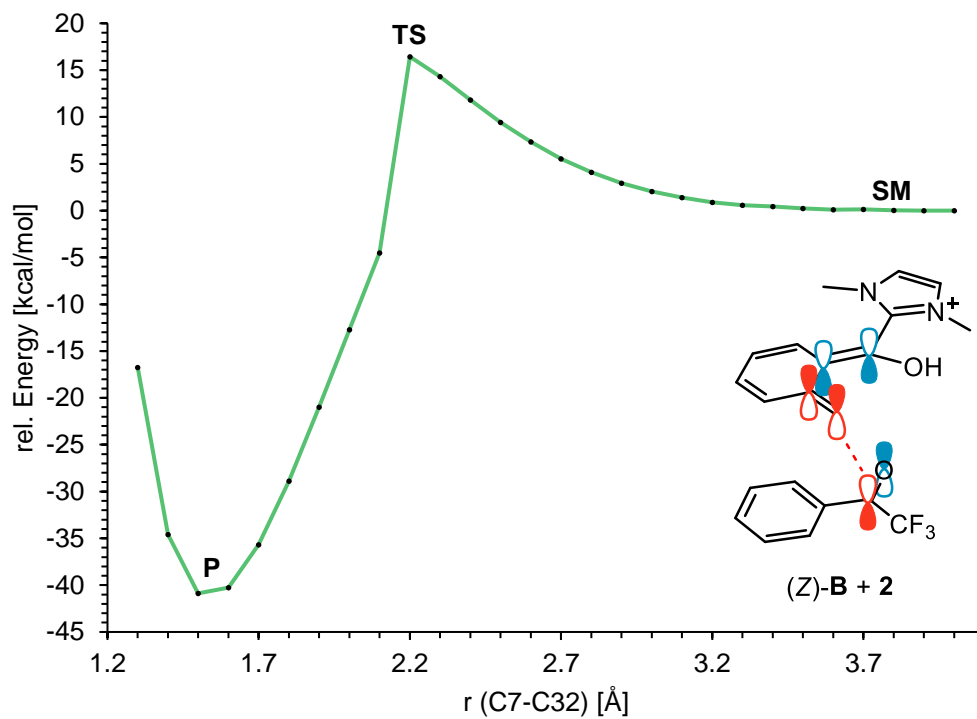

| Species | r (C7-C32) [Å] | Gibbs Free Energy [Eh] | rel. Gibbs Free Energy [kcal/mol] | Imaginary Frequencies      |
|---------|----------------|------------------------|-----------------------------------|----------------------------|
| SM      | 3.82           | -1370.658694           | 0.00                              | 0                          |
| TS      | 2.11           | -1370.620416           | 24.0                              | 1 (-425 cm <sup>-1</sup> ) |
| P       | 1.54           | -1370.707848           | -30.8                             | 0                          |

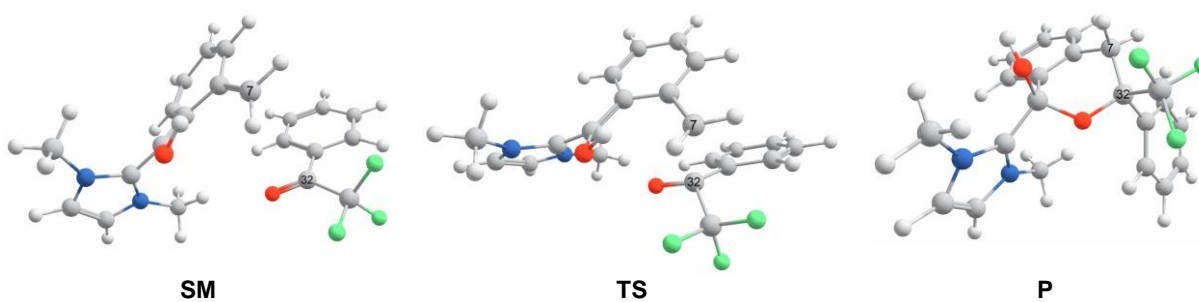

**Figure S20.** Relaxed PES scan of the (*Z*)-**B** *endo* cycloaddition with ketone **2** along the C7-C32 coordinate and the Gibbs free energies (298 K) and geometries of the involved species.

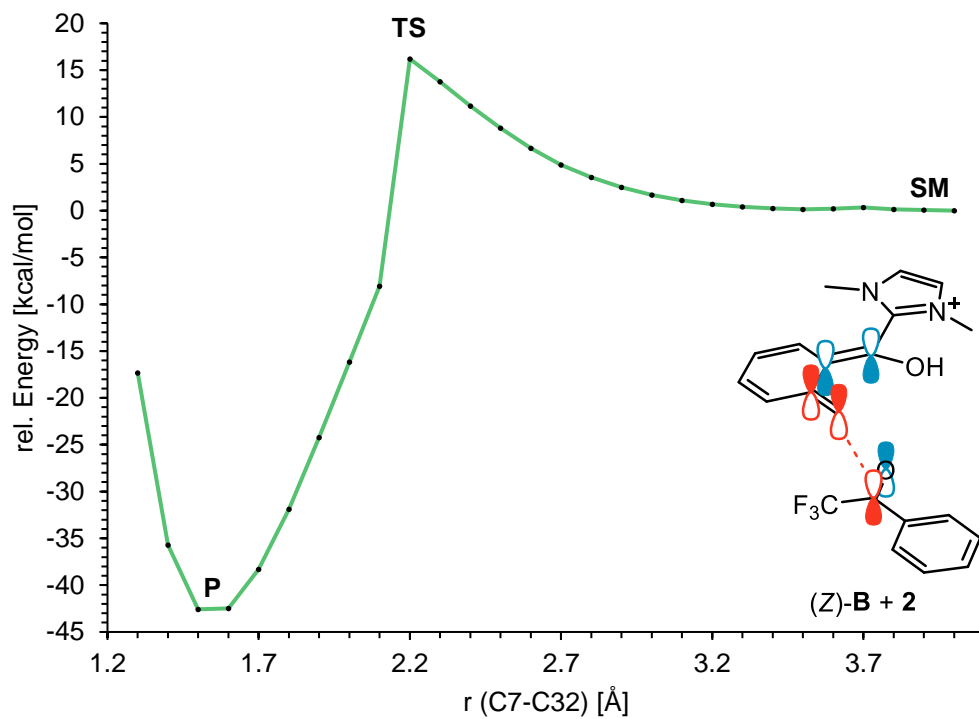

| Species   | r (C7-C32) [Å] | Gibbs Free Energy [Eh] | rel. Gibbs Free Energy [kcal/mol] | Imaginary Frequencies      |
|-----------|----------------|------------------------|-----------------------------------|----------------------------|
| <b>SM</b> | 3.96           | -1370.659701           | 0.00                              | 0                          |
| <b>TS</b> | 2.13           | -1370.621403           | 24.0                              | 1 (-438 cm <sup>-1</sup> ) |
| <b>P</b>  | 1.55           | -1370.710865           | -32.1                             | 0                          |

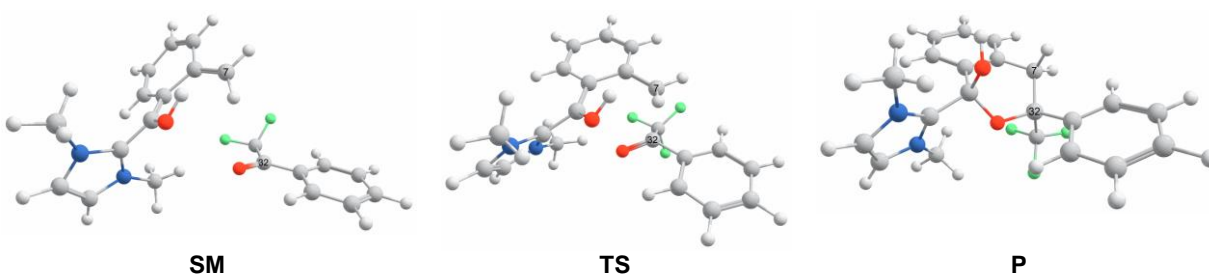

**Figure S21.** Relaxed PES scan of the (*Z*)-**B** *exo* cycloaddition with ketone **2** along the C7-C32 coordinate and the Gibbs free energies (298 K) and geometries of the involved species.

### 1.9 Dissociation of *anti*/*syn*-**D'**

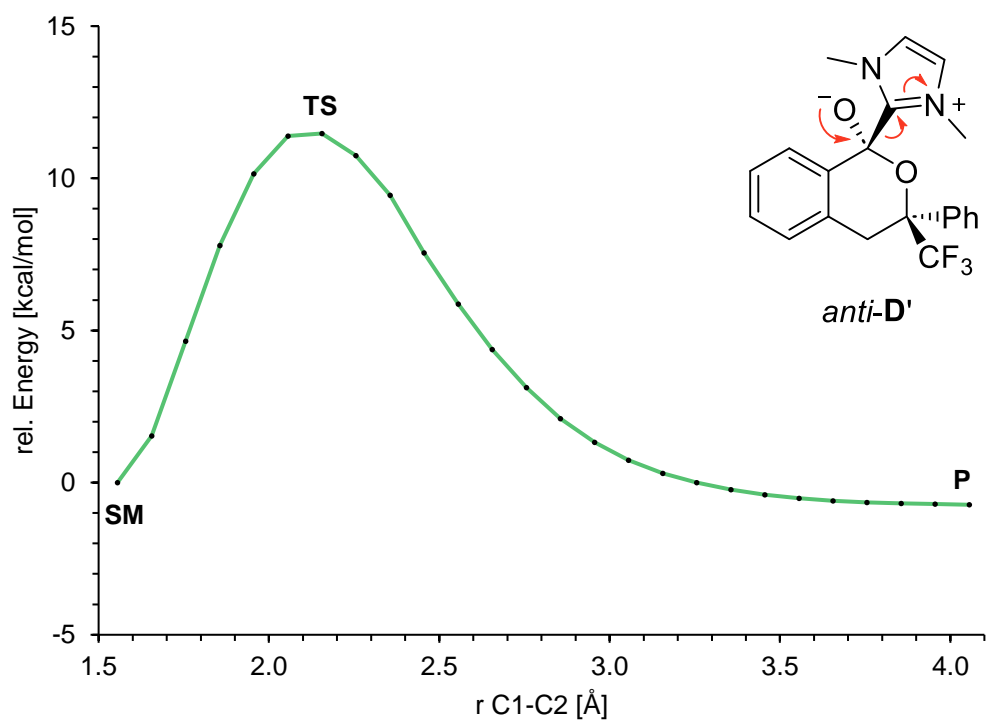

| Species   | r (C1-C2) [Å] | Gibbs Free Energy [Eh] | rel. Gibbs Free Energy [kcal/mol] | Imaginary Frequencies      |
|-----------|---------------|------------------------|-----------------------------------|----------------------------|
| <b>SM</b> | 1.56          | -1370.564028           | 0.00                              | 0                          |
| <b>TS</b> | 2.12          | -1370.549461           | 9.14                              | 1 (-240 cm <sup>-1</sup> ) |
| <b>P</b>  | 4.06          | -1370.577266           | -8.31                             | 0                          |

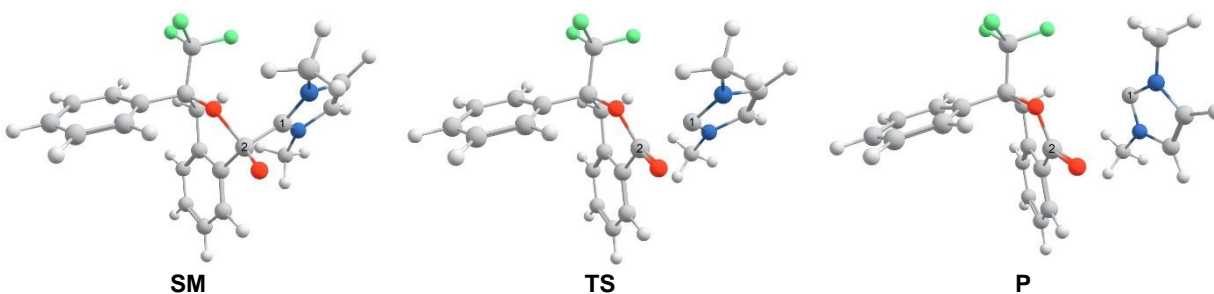

**Figure S22.** Relaxed PES scan of the dissociation of *anti*-**D'** along the C1-C2 coordinate and the Gibbs free energies (298 K) and geometries of the involved species.

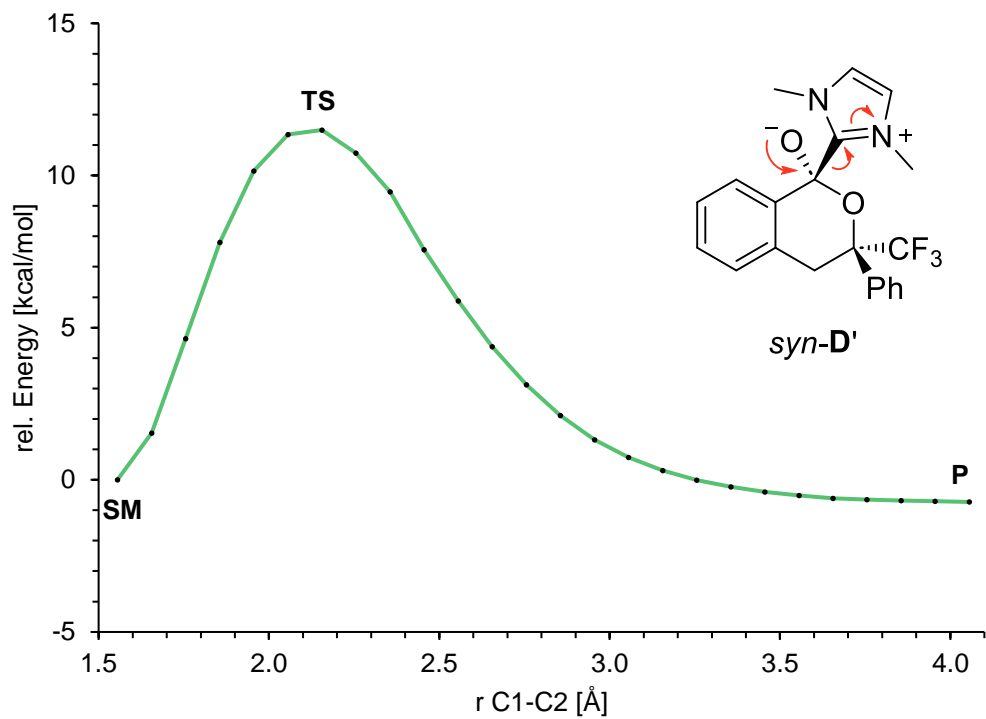

| Species   | r (C1-C2) [Å] | Gibbs Free Energy [Eh] | rel. Gibbs Free Energy [kcal/mol] | Imaginary Frequencies      |
|-----------|---------------|------------------------|-----------------------------------|----------------------------|
| <b>SM</b> | 1.56          | -1370.560522           | 2.20                              | 0                          |
| <b>TS</b> | 2.11          | -1370.547155           | 10.6                              | 1 (-240 cm <sup>-1</sup> ) |
| <b>P</b>  | 4.06          | -1370.574745           | -6.73                             | 0                          |

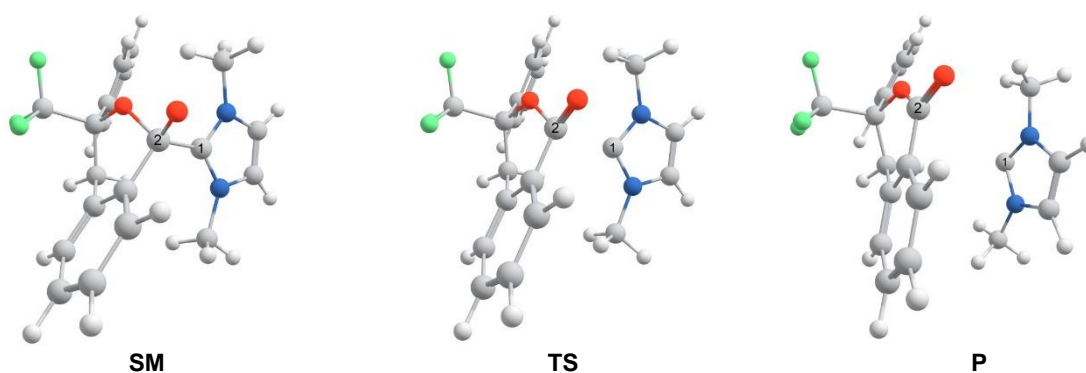

**Figure S23.** Relaxed PES scan of the dissociation of *syn-D'* along the C1-C2 coordinate and the calculated Gibbs free energies (298 K) and geometries of the involved species.



### 1.10 Calculated UV-Vis spectra

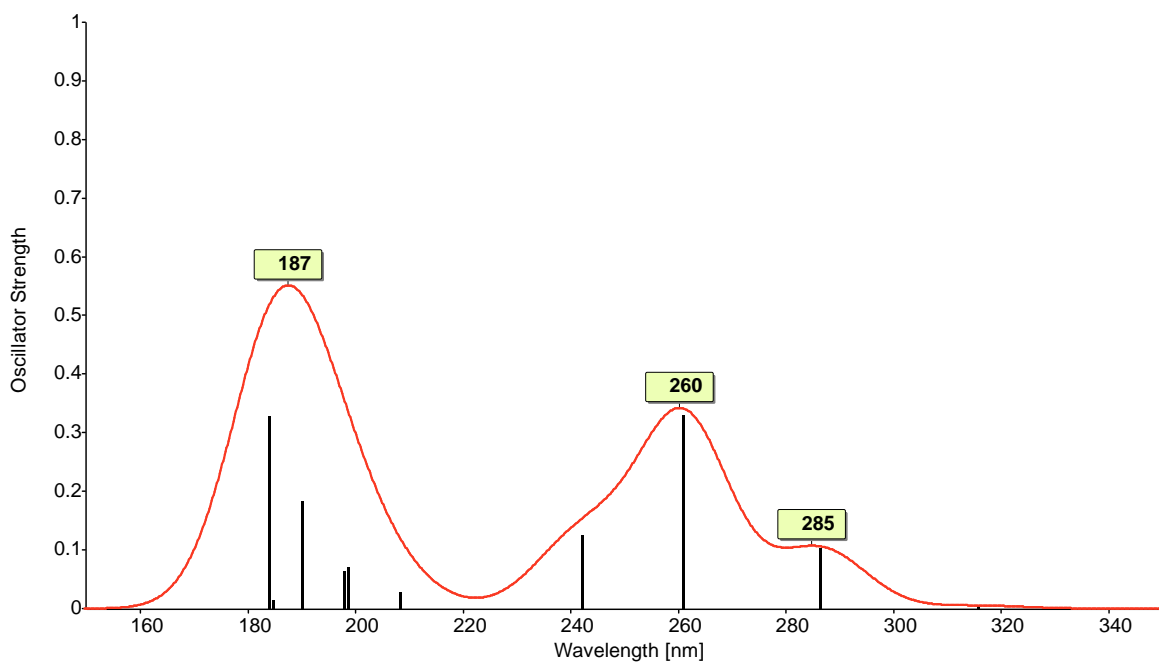

**Figure S24.** Calculated UV-Vis Spectrum of acyl azolium **A** at the TD-DFT level (CAM-B3LYP/6-311+G(d), PCM(CH<sub>3</sub>CN); nstates=10, Gaussian line broadening with FWHM = 20).

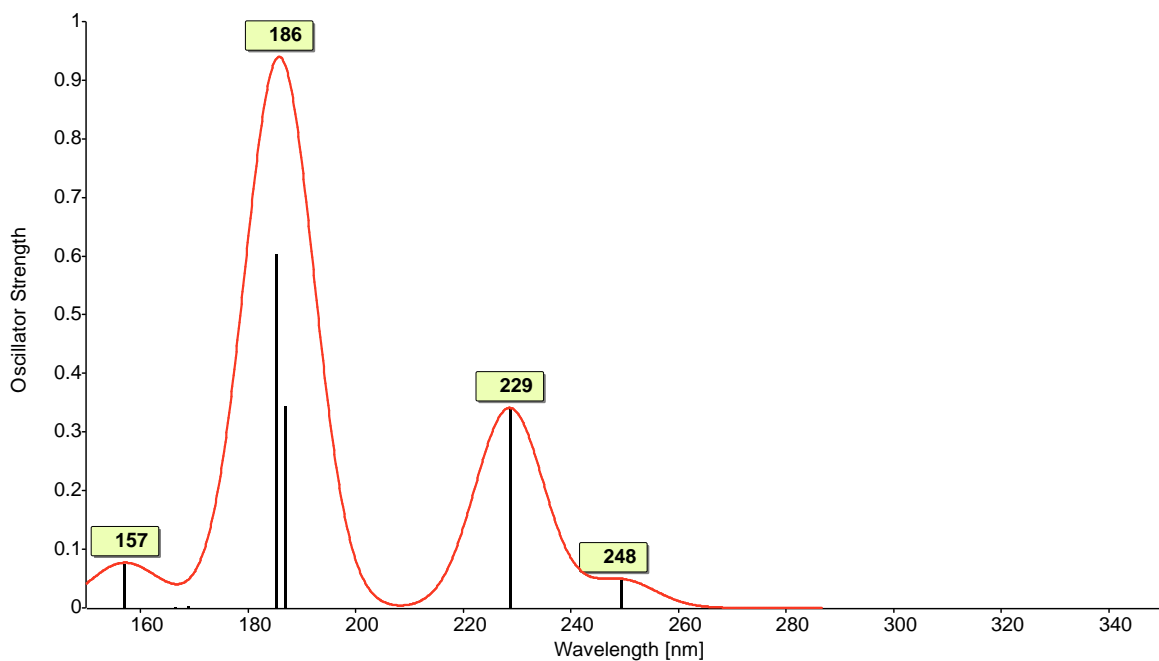

**Figure S25.** Calculated UV-Vis Spectrum of *ortho*-toluoyl fluoride **1** at the TD-DFT level of theory (CAM-B3LYP/6-311+G(d), PCM(CH<sub>3</sub>CN); nstates=10, Gaussian line broadening with FWHM = 20).

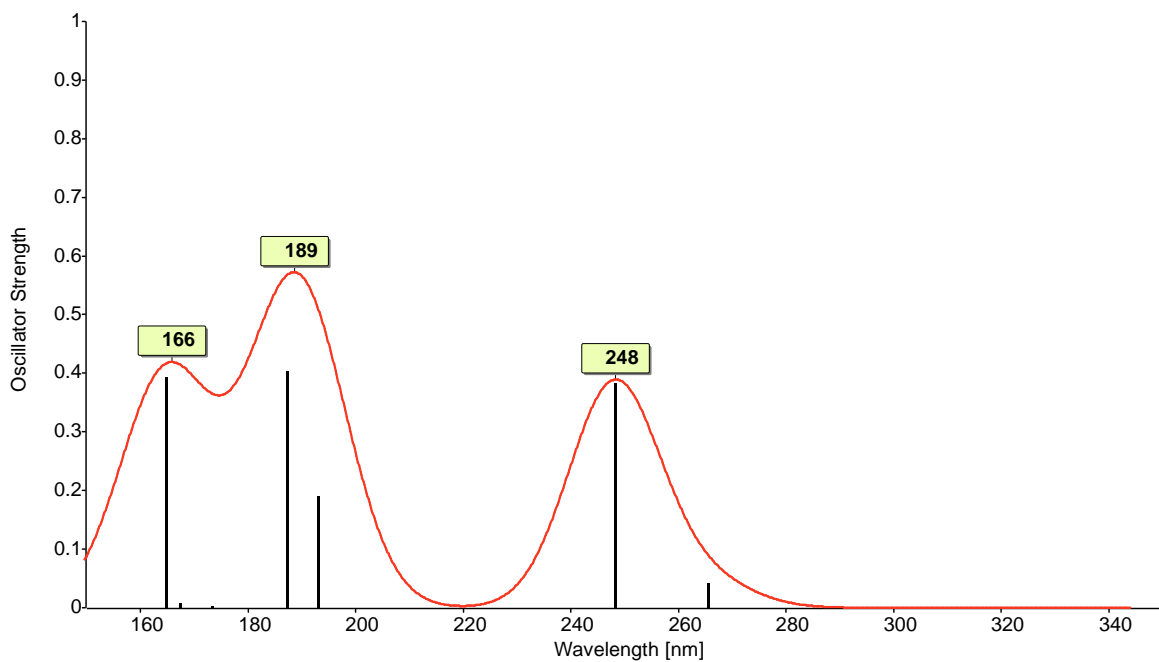

**Figure S26.** Calculated UV-Vis Spectrum of ketone **2** (dienophile) at the TD-DFT level of theory (CAM-B3LYP/6-311+G(d), PCM(CH<sub>3</sub>CN); nstates=10, Gaussian line broadening with FWHM = 20).

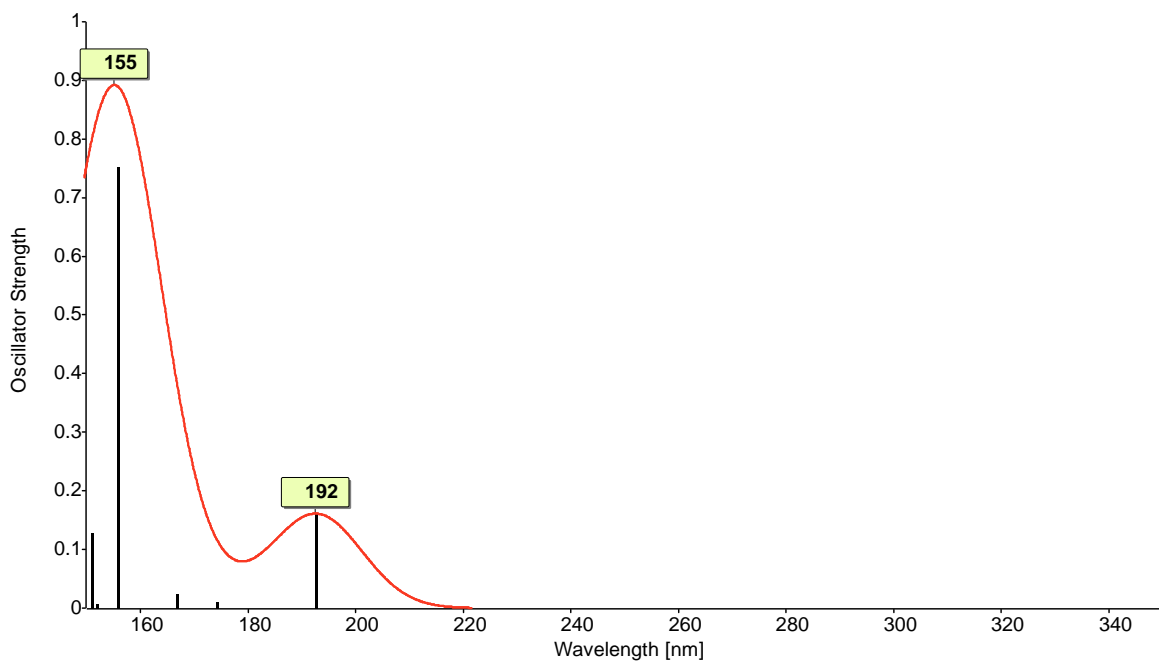

**Figure S27.** Calculated UV-Vis Spectrum of 1,3-dimethyl-1*H*-imidazol-3-ium (precatalyst) at the TD-DFT level of theory (CAM-B3LYP/6-311+G(d), PCM(CH<sub>3</sub>CN); nstates=10, Gaussian line broadening with FWHM = 20).

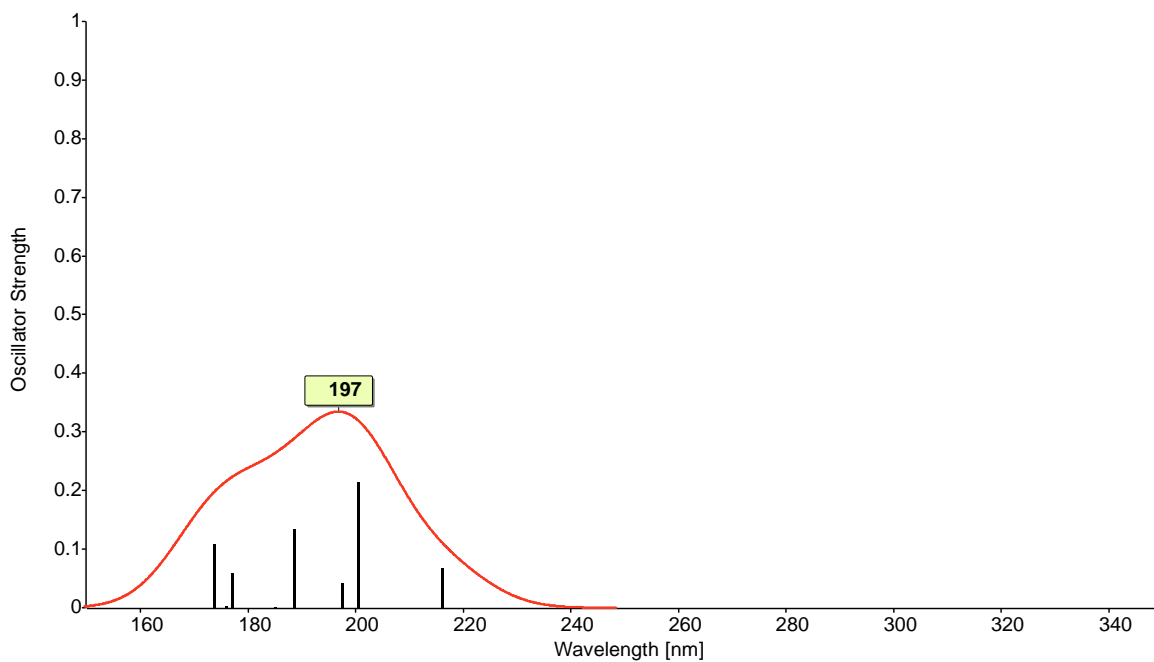

**Figure S28.** Calculated UV-Vis Spectrum of 1,3-dimethyl-1*H*-imidazolylidene (catalyst) at the TD-DFT level (CAM-B3LYP/6-311+G(d), PCM(CH<sub>3</sub>CN); nstates=10, Gaussian line broadening with FWHM = 20).

## 2. Catalytic Test Reactions

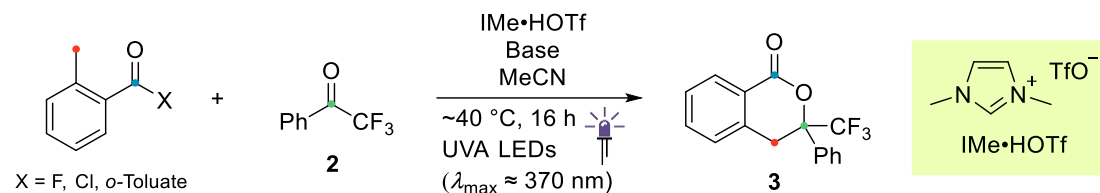

| Entry | Starting Material                              | Dienophile          | NHC•HX                | Base                                       | Solvent       | NMR Yield |
|-------|------------------------------------------------|---------------------|-----------------------|--------------------------------------------|---------------|-----------|
| 1     | <i>o</i> -Toluoyl fluoride <b>1</b><br>3 equiv | <b>2</b><br>1 equiv | IMe•HOTf<br>0.2 equiv | Na <sub>2</sub> CO <sub>3</sub><br>2 equiv | MeCN<br>0.1 M | 18%       |
| 2     | <i>o</i> -Toluoyl fluoride <b>1</b><br>3 equiv | <b>2</b><br>1 equiv | IMe•HOTf<br>0.2 equiv | K <sub>2</sub> CO <sub>3</sub><br>2 equiv  | MeCN<br>0.1 M | 6%        |
| 3     | <i>o</i> -Toluoyl fluoride <b>1</b><br>3 equiv | <b>2</b><br>1 equiv | IMe•HOTf<br>0.2 equiv | Rb <sub>2</sub> CO <sub>3</sub><br>2 equiv | MeCN<br>0.1 M | 62%       |
| 4     | <i>o</i> -Toluoyl fluoride <b>1</b><br>3 equiv | <b>2</b><br>1 equiv | IMe•HOTf<br>0.2 equiv | Cs <sub>2</sub> CO <sub>3</sub><br>2 equiv | MeCN<br>0.1 M | 88%       |
| 5     | <i>o</i> -Toluoyl fluoride <b>1</b><br>3 equiv | <b>2</b><br>1 equiv | IMe•HOTf<br>0.2 equiv | CsHCO <sub>3</sub><br>2 equiv              | MeCN<br>0.1 M | 6%        |
| 6     | <i>o</i> -Toluoyl fluoride <b>1</b><br>3 equiv | <b>2</b><br>1 equiv | IMe•HOTf<br>0.2 equiv | CsOPiv<br>2 equiv                          | MeCN<br>0.1 M | 10%       |
| 7     | <i>o</i> -Toluoyl chloride<br>3 equiv          | <b>2</b><br>1 equiv | IMe•HOTf<br>0.2 equiv | Cs <sub>2</sub> CO <sub>3</sub><br>2 equiv | MeCN<br>0.1 M | 17%       |
| 8     | <i>o</i> -Toluic anhydride<br>1.5 equiv        | <b>2</b><br>1 equiv | IMe•HOTf<br>0.2 equiv | Cs <sub>2</sub> CO <sub>3</sub><br>2 equiv | MeCN<br>0.1 M | 5%        |

**Figure S29.** Catalytic test reactions (0.1 mmol scale).

### 3. Crystallographic data

#### 3.1 *ortho*-Toluoyl 1,3-dimethylimidazolium triflate 4

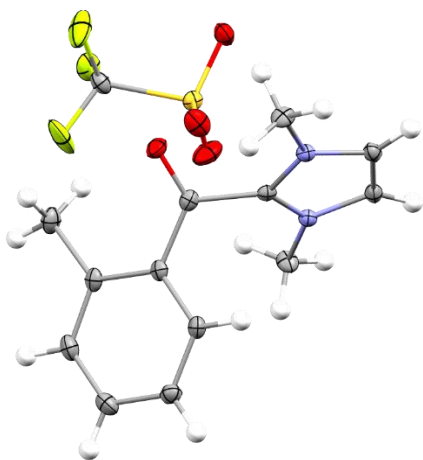

**Figure S30.** Crystal structure of *ortho*-Toluoyl 1,3-dimethylimidazolium triflate (thermal ellipsoids at 50% probability).

**Table S1.** Crystal data of *ortho*-toluoyl 1,3-dimethylimidazolium triflate.

|                                               |                                                                                                                                                |
|-----------------------------------------------|------------------------------------------------------------------------------------------------------------------------------------------------|
| CCDC Deposition Number                        | 2169961                                                                                                                                        |
| Sum formula                                   | C <sub>14</sub> H <sub>15</sub> F <sub>3</sub> N <sub>2</sub> O <sub>4</sub> S                                                                 |
| Formula weight /g mol <sup>-1</sup>           | 364.34                                                                                                                                         |
| Temperature /K                                | 100(2)                                                                                                                                         |
| Crystal system                                | monoclinic                                                                                                                                     |
| Space group                                   | C 2/c                                                                                                                                          |
| Cell dimensions /Å or °                       | a = 25.7587(4)                      α = 90<br>b = 7.7074(10)                      β = 92.5083(6)<br>c = 16.1440(3)                      γ = 90 |
| Volume /Å <sup>3</sup>                        | 3202.04(9)                                                                                                                                     |
| Z                                             | 8                                                                                                                                              |
| Density /g cm <sup>-3</sup>                   | 1.512                                                                                                                                          |
| μ /mm <sup>-1</sup>                           | 0.256                                                                                                                                          |
| F(000)                                        | 1504.0                                                                                                                                         |
| Crystal size /mm <sup>-3</sup>                | 0.85 x 0.30 x 0.16                                                                                                                             |
| Radiation /Å                                  | 0.71073 (MoKα)                                                                                                                                 |
| Θ range for data collection /°                | 2.526 to 26.397                                                                                                                                |
| Reflections collected                         | 11352                                                                                                                                          |
| Independent reflections                       | 3262 [R <sub>int</sub> = 0.0245, R <sub>sigma</sub> = 0.0236]                                                                                  |
| Data/restraints/parameters                    | 3262/0/221                                                                                                                                     |
| Goodness-of-fit on F <sup>2</sup>             | S = 1.059                                                                                                                                      |
| Final R indexes [I > 2σ(I)]                   | R1 = 0.0357, wR2 = 0.0890                                                                                                                      |
| Final R indexes [all data]                    | R1 = 0.0390, wR2 = 0.0912                                                                                                                      |
| Largest diff. peak and hole/e Å <sup>-3</sup> | 0.40 and -0.40                                                                                                                                 |

### 3.2 Major diastereomer in the PEDA reaction of *ortho*-ethylbenzoyl fluoride

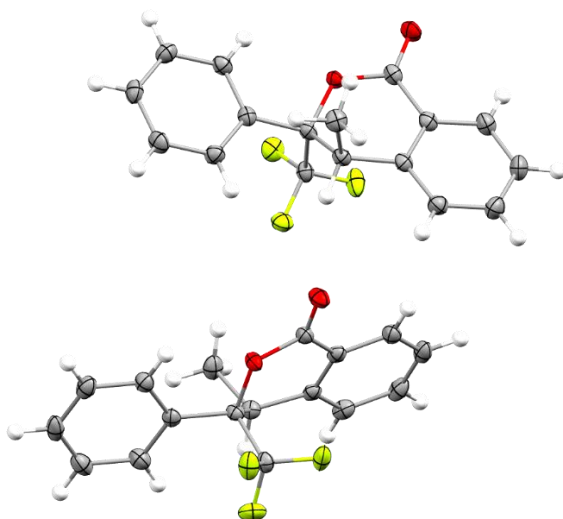

**Figure S31.** Crystal structure of (3*S*,4*R*)- and (3*R*,4*S*)-4-methyl-3-phenyl-3-(trifluoromethyl)isochroman-1-one (thermal ellipsoids at 50% probability).

**Table S2.** Crystal data of (3*S*,4*R*)- and (3*R*,4*S*)-4-methyl-3-phenyl-3-(trifluoromethyl)isochroman-1-one

|                                                            |                                                               |                                                                       |
|------------------------------------------------------------|---------------------------------------------------------------|-----------------------------------------------------------------------|
| CCDC Deposition Number                                     | 2169962                                                       |                                                                       |
| Sum formula                                                | C <sub>17</sub> H <sub>13</sub> F <sub>3</sub> O <sub>2</sub> |                                                                       |
| Formula weight /g mol <sup>-1</sup>                        | 306.27                                                        |                                                                       |
| Temperature /K                                             | 100(2)                                                        |                                                                       |
| Crystal system                                             | triclinic                                                     |                                                                       |
| Space group                                                | P $\bar{1}$                                                   |                                                                       |
| Cell dimensions /Å or °                                    | a = 9.2422(7)<br>b = 11.4334(7)<br>c = 14.3847(12)            | $\alpha$ = 87.244(2)<br>$\beta$ = 72.344(2)<br>$\gamma$ = 78.9480(10) |
| Volume /Å <sup>3</sup>                                     | 1421.48(18)                                                   |                                                                       |
| Z                                                          | 4                                                             |                                                                       |
| Density /g cm <sup>-3</sup>                                | 1.431                                                         |                                                                       |
| $\mu$ /mm <sup>-1</sup>                                    | 1.024                                                         |                                                                       |
| F(000)                                                     | 632.0                                                         |                                                                       |
| Crystal size /mm <sup>-3</sup>                             | 0.50 x 0.43 x 0.40                                            |                                                                       |
| Radiation /Å                                               | 1.54178 (CuK $\alpha$ )                                       |                                                                       |
| $\Theta$ range for data collection /°                      | 3.224 to 68.309                                               |                                                                       |
| Reflections collected                                      | 27657                                                         |                                                                       |
| Independent reflections                                    | 5070 [R <sub>int</sub> = 0.0295, R <sub>sigma</sub> = 0.0251] |                                                                       |
| Data/restraints/parameters                                 | 5070/0/400                                                    |                                                                       |
| Goodness-of-fit on F <sup>2</sup>                          | S = 1.100                                                     |                                                                       |
| Final R indexes [I > 2 $\sigma$ (I)]                       | R1 = 0.0362, wR2 = 0.0903                                     |                                                                       |
| Final R indexes [all data]                                 | R1 = 0.0370, wR2 = 0.0909                                     |                                                                       |
| Largest diff. peak and hole/e <sup>-</sup> Å <sup>-3</sup> | 0.34 and -0.22                                                |                                                                       |

### 3.3 Major diastereomer in the PEDA reaction of *ortho*-benzylbenzoyl fluoride

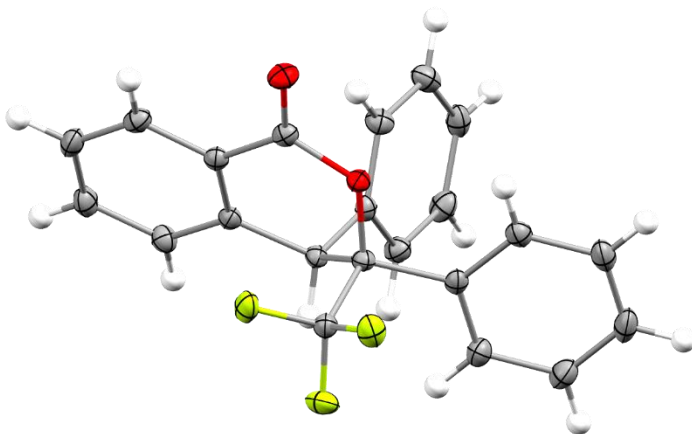

**Figure S32.** Crystal structure of (3*S*,4*R*)-3,4-diphenyl-3-(trifluoro-methyl)isochroman-1-one (thermal ellipsoids at 50% probability).

**Table S3.** Crystal data of (3*S*,4*R*)-3,4-diphenyl-3-(trifluoro-methyl)isochroman-1-one

|                                                            |                                                               |                                    |
|------------------------------------------------------------|---------------------------------------------------------------|------------------------------------|
| CCDC Deposition Number                                     | 2169963                                                       |                                    |
| Sum formula                                                | C <sub>22</sub> H <sub>15</sub> F <sub>3</sub> O <sub>2</sub> |                                    |
| Formula weight /g mol <sup>-1</sup>                        | 368.34                                                        |                                    |
| Temperature /K                                             | 100(2)                                                        |                                    |
| Crystal system                                             | monoclinic                                                    |                                    |
| Space group                                                | P 2 <sub>1</sub> /n                                           |                                    |
| Cell dimensions /Å or °                                    | a = 9.6916(2)<br>b = 13.1235(2)<br>c = 13.3856(2)             | α = 90<br>β = 97.0695(7)<br>γ = 90 |
| Volume /Å <sup>3</sup>                                     | 1689.54(5)                                                    |                                    |
| Z                                                          | 4                                                             |                                    |
| Density /g cm <sup>-3</sup>                                | 1.448                                                         |                                    |
| μ /mm <sup>-1</sup>                                        | 0.114                                                         |                                    |
| F(000)                                                     | 760.0                                                         |                                    |
| Crystal size /mm <sup>-3</sup>                             | 0.28 x 0.15 x 0.15                                            |                                    |
| Radiation /Å                                               | 0.71073 (MoKα)                                                |                                    |
| Θ range for data collection /°                             | 2.181 to 26.395                                               |                                    |
| Reflections collected                                      | 30837                                                         |                                    |
| Unique reflections                                         | 3458 [R <sub>int</sub> = 0.0324, R <sub>sigma</sub> = 0.0152] |                                    |
| Data/restraints/parameters                                 | 3458/0/244                                                    |                                    |
| Goodness-of-fit on F <sup>2</sup>                          | S = 1.066                                                     |                                    |
| Final R indexes [I > 2σ(I)]                                | R1 = 0.0326, wR2 = 0.0796                                     |                                    |
| Final R indexes [all data]                                 | R1 = 0.0355, wR2 = 0.0818                                     |                                    |
| Largest diff. peak and hole/e <sup>-</sup> Å <sup>-3</sup> | 0.39 and -0.26                                                |                                    |
